# Supplementary material for: A gene regulatory network–aware graph learning method for cell identity annotation in single-cell RNA-seq data
Source: HighWire-hosted journal article supplement (doi:10.1101/gr.278439.123), 2024-07-01
Supplement: Supplemental_Tables.xlsx [file Supplemental_Tables.xlsx]

## Sheet: Supplemental_Table_S1
Supplemental_Table_S1. The detailed statistics of datasets involved in the study
Dataset	No. of cells	No. of genes	No. of cell types	Protocol	Reference	Download
PBMC-FACS	20000	21952	10	10X Chromium	Zheng GXY, Terry JM, Belgrader P, Ryvkin P, Bent ZW, Wilson R, et al. Massively parallel digital transcriptional profiling of single cells. Nat Commun. 2017;8:14049. https://doi.org/10.1038/ncomms14049.	https://zenodo.org/record/3357167
AMB	12832	42625	16	SMART-Seq v4	Tasic B, Yao Z, Graybuck LT, Smith KA, Nguyen TN, Bertagnolli D, et al. Shared and distinct transcriptomic cell types across neocortical areas. Nature. 2018;563:72–78.https://doi.org/10.1038/s41586-018-0654-5.	https://zenodo.org/record/3357167
PBMC1-10X2	6444	33694	9	10X version 2	Ding, J., Adiconis, X., Simmons, S.K. et al. Systematic comparison of single-cell and single-nucleus RNA-sequencing methods. Nat Biotechnol 38, 737–746 (2020). https://doi.org/10.1038/s41587-020-0465-8	https://zenodo.org/record/3357167
PBMC1-10X3	3222	33694	8	10X version 3	Ding, J., Adiconis, X., Simmons, S.K. et al. Systematic comparison of single-cell and single-nucleus RNA-sequencing methods. Nat Biotechnol 38, 737–746 (2020). https://doi.org/10.1038/s41587-020-0465-9	https://zenodo.org/record/3357167
PBMC1-SM2	253	33694	6	SMART-Seq2	Ding, J., Adiconis, X., Simmons, S.K. et al. Systematic comparison of single-cell and single-nucleus RNA-sequencing methods. Nat Biotechnol 38, 737–746 (2020). https://doi.org/10.1038/s41587-020-0465-10	https://zenodo.org/record/3357167
PBMC1-CS2	253	33694	7	CEL-Seq2	Ding, J., Adiconis, X., Simmons, S.K. et al. Systematic comparison of single-cell and single-nucleus RNA-sequencing methods. Nat Biotechnol 38, 737–746 (2020). https://doi.org/10.1038/s41587-020-0465-11	https://zenodo.org/record/3357167
PBMC1-DS	3222	33694	9	Drop-Seq	Ding, J., Adiconis, X., Simmons, S.K. et al. Systematic comparison of single-cell and single-nucleus RNA-sequencing methods. Nat Biotechnol 38, 737–746 (2020). https://doi.org/10.1038/s41587-020-0465-12	https://zenodo.org/record/3357167
PBMC1-D	3222	33694	7	inDrop	Ding, J., Adiconis, X., Simmons, S.K. et al. Systematic comparison of single-cell and single-nucleus RNA-sequencing methods. Nat Biotechnol 38, 737–746 (2020). https://doi.org/10.1038/s41587-020-0465-13	https://zenodo.org/record/3357167
PBMC1-SW	3176	33694	7	Seq-Well	Ding, J., Adiconis, X., Simmons, S.K. et al. Systematic comparison of single-cell and single-nucleus RNA-sequencing methods. Nat Biotechnol 38, 737–746 (2020). https://doi.org/10.1038/s41587-020-0465-14	https://zenodo.org/record/3357167
PBMC2-10X2	3362	33694	9	10X version 2	Ding, J., Adiconis, X., Simmons, S.K. et al. Systematic comparison of single-cell and single-nucleus RNA-sequencing methods. Nat Biotechnol 38, 737–746 (2020). https://doi.org/10.1038/s41587-020-0465-15	https://zenodo.org/record/3357167
Human	7266	17499	14	inDrop	Baron M, Veres A, Wolock SL, Faust AL, Gaujoux R, Vetere A, et al. A singlecell transcriptomic map of the human and mouse pancreas reveals interand intra-cell population structure. Cell Syst. 2016;3:346–60.e4. https://doi. org/10.1016/j.cels.2016.08.011.	https://www.ncbi.nlm.nih.gov/geo/query/acc.cgi?acc=GSE84133
Mouse	1886	14861	13	inDrop	Baron M, Veres A, Wolock SL, Faust AL, Gaujoux R, Vetere A, et al. A singlecell transcriptomic map of the human and mouse pancreas reveals interand intra-cell population structure. Cell Syst. 2016;3:346–60.e4. https://doi. org/10.1016/j.cels.2016.08.011.	https://www.ncbi.nlm.nih.gov/geo/query/acc.cgi?acc=GSE84133
Diabetes mellitus	1303	17499	14	inDrop	Baron M, Veres A, Wolock SL, Faust AL, Gaujoux R, Vetere A, et al. A singlecell transcriptomic map of the human and mouse pancreas reveals interand intra-cell population structure. Cell Syst. 2016;3:346–60.e4. https://doi. org/10.1016/j.cels.2016.08.011.	https://www.ncbi.nlm.nih.gov/geo/query/acc.cgi?acc=GSE84133
Human lung atlas	65662	26484	57	10X Chromium	Travaglini, K.J., Nabhan, A.N., Penland, L., Sinha, R., Gillich, A., Sit, R.V., Chang, S., Conley, S.D., Mori, Y., Seita, J., Berry, G.J., Shrager, J.B., Metzger, R.J., Kuo, C.S., Neff, N., Weissman, I.L., Quake, S.R., Krasnow, M.A.: A molecular cell atlas of the human lung from single-cell rna sequencing. Nature 587(7835), 619–625 (2020). doi:10.1038/s41586-020-2922-4	https://www.synapse.org/#!Synapse:syn21041850
COVID-19 Mild	20234	33539	-	10X Genomics	Liao, M., Liu, Y., Yuan, J., Wen, Y., Xu, G., Zhao, J., Cheng, L., Li, J., Wang, X., Wang, F., Liu, L., Amit, I., Zhang, S., Zhang, Z.: Single-cell landscape of bronchoalveolar immune cells in patients with covid-19. Nature medicine 26(6), 842–844 (2020). doi:10.1038/s41591-020-0901-9	https://www.ncbi.nlm.nih.gov/geo/query/acc.cgi?acc=GSE145926
COVID-19 Severe	43012	33539	-	10X Genomics	Liao, M., Liu, Y., Yuan, J., Wen, Y., Xu, G., Zhao, J., Cheng, L., Li, J., Wang, X., Wang, F., Liu, L., Amit, I., Zhang, S., Zhang, Z.: Single-cell landscape of bronchoalveolar immune cells in patients with covid-19. Nature medicine 26(6), 842–844 (2020). doi:10.1038/s41591-020-0901-9	https://www.ncbi.nlm.nih.gov/geo/query/acc.cgi?acc=GSE145926

## Sheet: Supplemental_Table_S2
		Supplemental_Table_S2. The CDI of each Reference-Query scenario
Scenario	Experiment scenario	Reference	Query	CDI	CDI_rank	Average_CDI
Intra-datasets	Intra-datasets	PBMC-FACS-2, PBMC-FACS-3, PBMC-FACS-4, PBMC-FACS-5	PBMC-FACS-1	0.266202	9	0.266494
		PBMC-FACS-1, PBMC-FACS-3, PBMC-FACS-4, PBMC-FACS-5	PBMC-FACS-2	0.266961	10
		PBMC-FACS-1, PBMC-FACS-2, PBMC-FACS-4, PBMC-FACS-5	PBMC-FACS-3	0.265878	8
		PBMC-FACS-1, PBMC-FACS-2, PBMC-FACS-3, PBMC-FACS-5	PBMC-FACS-4	0.265581	7
		PBMC-FACS-1, PBMC-FACS-2, PBMC-FACS-3, PBMC-FACS-4	PBMC-FACS-5	0.267848	11
		AMB-2, AMB-3, AMB-4, AMB-5	AMB-1	0.00125643	1	0.00226398
		AMB-1, AMB-3, AMB-4, AMB-5	AMB-2	0.00261756	4
		AMB-1, AMB-2, AMB-4, AMB-5	AMB-3	0.00150957	2
		AMB-1, AMB-2, AMB-3, AMB-5	AMB-4	0.00246249	3
		AMB-1, AMB-2, AMB-3, AMB-4	AMB-5	0.00347386	5
Inter-datasets	Inter-datasets	PBMC1-10X2, PBMC1-10X3	PBMC1-SM2	0.460074	13	0.540215
			PBMC1-CS2	0.707107	21
			PBMC1-DS	0.657951	19
			PBMC1-D	0.493069	15
			PBMC1-SW	0.559766	17
			PBMC2-10X2	0.363326	12
Cross-species datasets	Cross-species datasets	Human1, Human2, Human3	Mouse1	0.538715	16	0.610054
			Mouse2	0.466895	14
		Mouse1, Mouse2	Human1	0.683665	20
			Human2	0.707137	22
			Human3	0.653856	18
		Human1, Human2, Human3	Diabetes mellitus	0.168181	6

## Sheet: Supplemental_Table_S3
Supplemental_Table_S3. The proportions of each cell type in Human lung atlas
Cell type	Cell ratio
Macrophage	0.2243
Capillary	0.1125
Natural Killer	0.0726
Capillary Aerocyte	0.0662
Alveolar Epithelial Type 2	0.058
CD4+ Memory/Effector T	0.0458
Classical Monocyte	0.0316
CD8+ Naive T	0.031
Pericyte	0.0244
Artery	0.0226
Basophil/Mast 1	0.0205
Ciliated	0.0201
Alveolar Fibroblast	0.0197
CD8+ Memory/Effector T	0.0181
Vein	0.0175
Alveolar Epithelial Type 1	0.0148
CD4+ Naive T	0.0141
Club	0.0141
Nonclassical Monocyte	0.0122
B	0.011
Airway Smooth Muscle	0.0105
Signaling Alveolar Epithelial Type 2	0.0101
Capillary Intermediate 1	0.0095
Adventitial Fibroblast	0.0084
Basophil/Mast 2	0.0084
Mucous	0.0074
Lymphatic	0.0071
Vascular Smooth Muscle	0.0071
Capillary Intermediate 2	0.007
Bronchial Vessel 1	0.0069
Basal	0.0066
Goblet	0.0055
Natural Killer T	0.0051
IGSF21+ Dendritic	0.0042
Myeloid Dendritic Type 2	0.004
Differentiating Basal	0.004
Myofibroblast	0.0037
Bronchial Vessel 2	0.0035
Proliferating Macrophage	0.0034
OLR1+ Classical Monocyte	0.0031
Plasma	0.0028
Intermediate Monocyte	0.0028
TREM2+ Dendritic	0.0024
Proximal Basal	0.0023
EREG+ Dendritic	0.0021
Plasmacytoid Dendritic	0.002
Myeloid Dendritic Type 1	0.0019
Proliferating NK/T	0.0015
Fibromyocyte	0.0014
Proximal Ciliated	0.0013
Proliferating Basal	0.0007
Platelet/Megakaryocyte	0.0006
Lipofibroblast	0.0005
Mesothelial	0.0004
Ionocyte	0.0003
Serous	0.0003
Neuroendocrine	0.0001

## Sheet: Supplemental_Table_S4
Supplemental_Table_S4. The proportions of each cell type in COVID-19 Mild
Cell type	Cell ratio
Macrophage	0.383118
Ciliated	0.100425
CD8+ Naive T	0.080755
Nonclassical Monocyte	0.058762
Proliferating NK/T	0.049076
Intermediate Monocyte	0.04275
IGSF21+ Dendritic	0.037758
TREM2+ Dendritic	0.03672
CD4+ Memory/Effector T	0.027281
Goblet	0.018434
Natural Killer	0.017001
Proliferating Macrophage	0.011911
EREG+ Dendritic	0.009736
B	0.009192
Myeloid Dendritic Type 2	0.009143
Alveolar Epithelial Type 2	0.008846
Proximal Ciliated	0.008056
Plasmacytoid Dendritic	0.007611
Capillary Aerocyte	0.007067
Mucous	0.00687
OLR1+ Classical Monocyte	0.006425
Club	0.006128
Capillary	0.005338
Basal	0.005288
Differentiating Basal	0.004695
Classical Monocyte	0.004646
Myeloid Dendritic Type 1	0.003904
CD8+ Memory/Effector T	0.003262
Ionocyte	0.002916
Proliferating Basal	0.002866
Vein	0.002372
Alveolar Fibroblast	0.002323
Mesothelial	0.001779
Pericyte	0.001779
Artery	0.001631
CD4+ Naive T	0.001384
Lipofibroblast	0.001384
Basophil/Mast 1	0.001285
Proximal Basal	0.001186
Natural Killer T	0.001137
Lymphatic	0.001087
Alveolar Epithelial Type 1	0.001087
Neuroendocrine	0.001087
Serous	0.000939
Capillary Intermediate 2	0.000692
Platelet/Megakaryocyte	0.000544
Plasma	0.000494
Bronchial Vessel 1	0.000494
Adventitial Fibroblast	0.000395
Basophil/Mast 2	0.000297
Bronchial Vessel 2	0.000297
Signaling Alveolar Epithelial Type 2	9.88e-05
Vascular Smooth Muscle	9.88e-05
Myofibroblast	4.94e-05
Fibromyocyte	4.94e-05
Airway Smooth Muscle	4.94e-05

## Sheet: Supplemental_Table_S5
Supplemental_Table_S5. The proportions of each cell type in COVID-19 Severe
Cell type	Cell ratio
OLR1+ Classical Monocyte	0.288571
Macrophage	0.194597
Capillary	0.179741
Intermediate Monocyte	0.072236
Nonclassical Monocyte	0.04608
CD8+ Naive T	0.03041
Ciliated	0.023133
Proliferating NK/T	0.018646
Classical Monocyte	0.017205
Proliferating Macrophage	0.015996
CD4+ Memory/Effector T	0.015531
Natural Killer	0.014856
EREG+ Dendritic	0.011067
TREM2+ Dendritic	0.00844
Goblet	0.007696
Basophil/Mast 2	0.007417
Basal	0.004278
Artery	0.004208
Alveolar Fibroblast	0.004022
Myeloid Dendritic Type 1	0.003929
IGSF21+ Dendritic	0.003232
Plasma	0.003115
B	0.002534
Differentiating Basal	0.002534
Lipofibroblast	0.002395
Alveolar Epithelial Type 1	0.002302
Serous	0.001976
CD4+ Naive T	0.001674
Capillary Aerocyte	0.001651
Plasmacytoid Dendritic	0.001441
CD8+ Memory/Effector T	0.001046
Alveolar Epithelial Type 2	0.00086
Mucous	0.000814
Proximal Ciliated	0.000744
Proliferating Basal	0.000558
Lymphatic	0.000535
Capillary Intermediate 2	0.000511
Natural Killer T	0.000511
Vein	0.000488
Mesothelial	0.000418
Myeloid Dendritic Type 2	0.000395
Neuroendocrine	0.000325
Signaling Alveolar Epithelial Type 2	0.000302
Pericyte	0.000302
Bronchial Vessel 2	0.000302
Proximal Basal	0.000186
Bronchial Vessel 1	0.000186
Ionocyte	0.000163
Club	0.000139
Platelet/Megakaryocyte	9.3e-05
Vascular Smooth Muscle	6.97e-05
Fibromyocyte	4.65e-05
Basophil/Mast 1	4.65e-05
Myofibroblast	2.32e-05
Adventitial Fibroblast	2.32e-05

## Sheet: Supplemental_Table_S6
Supplemental_Table_S6. The weight of each gene in COVID-19 Mild
	GSM4339769	GSM4339770	GSM4339772	Sum of Abs
UBE2C	8.12303	6.91879	9.95246	24.9943
CD79A	6.71853	8.04412	8.91816	23.6808
TOP2A	7.83749	5.12727	10.0931	23.0579
NUSAP1	5.84207	5.25652	6.65108	17.7497
TYMS	3.44224	7.5642	6.14413	17.1506
TK1	4.94819	3.56628	8.38903	16.9035
CLEC10A	4.20748	4.54189	7.68693	16.4363
CDKN3	5.43445	4.35805	5.57612	15.3686
TCL1A	3.65448	4.55448	6.55494	14.7639
CENPF	4.42924	3.31544	6.92138	14.6661
VWF	4.11144	4.795	5.62489	14.5313
CDK1	5.33491	5.97898	3.12667	14.4406
GZMK	3.42191	4.33356	6.60306	14.3585
BIRC5	2.5259	5.78146	5.69975	14.0071
FCN1	4.67422	4.49106	4.82381	13.9891
RRM2	5.95717	2.94435	5.04105	13.9426
CXCL9	2.89013	4.74215	5.57715	13.2094
CCNB2	-2.63233	5.79191	4.40625	12.8305
CXCL12	3.60063	-1.98646	6.86771	12.4548
CD207	4.00268	4.2665	3.90081	12.17
MKI67	-4.36776	2.15429	5.53128	12.0533
IGFBP3	2.84085	4.18549	4.8985	11.9248
SFRP4	3.03019	3.27864	5.33414	11.643
CD1E	2.75283	3.9764	4.5123	11.2415
CCL17	4.82076	3.7969	-2.43596	11.0536
COL3A1	3.6259	3.93491	3.44073	11.0015
IDO1	1.41667	0.738637	7.80646	9.96177
EDN1	3.02752	3.04727	3.80913	9.88393
C7	2.70221	4.53885	2.57926	9.82033
AKAP12	2.97763	3.41369	3.39192	9.78325
DERL3	2.32193	3.20292	4.2551	9.77995
HMOX1	3.38032	2.98922	3.29122	9.66076
CPA3	2.86234	3.2106	3.52015	9.59309
KRT4	3.44589	4.39111	1.65506	9.49205
KRT13	4.09651	1.97034	3.42509	9.49195
CD1C	3.24739	3.0954	3.1442	9.487
ADAMDEC1	3.33687	3.10914	3.02247	9.46848
PLVAP	2.91392	3.28772	3.24292	9.44456
VCAN	2.44407	3.38851	3.59647	9.42905
AQP5	2.19751	3.48129	3.69764	9.37644
LY6D	2.8792	3.27526	2.86676	9.02123
AKR1C3	2.31003	3.25677	3.23052	8.79732
HPGD	2.76499	2.54855	3.26105	8.57459
ATP6V1G3	2.45875	3.33291	2.77653	8.56819
AGER	2.18999	2.83544	3.34331	8.36874
ASPN	2.3598	3.27026	2.54119	8.17126
IL17C	2.50503	3.01196	2.65	8.16699
FOXI1	2.36262	2.47749	3.28757	8.12768
KRT5	2.07129	2.50905	3.48381	8.06415
CHIT1	-0.628194	3.22464	4.14963	8.00246
FSTL3	2.24091	2.668	2.98516	7.89406
CA1	0.867801	0.873685	6.11259	7.85408
HMMR	-3.31925	0.96503	3.52888	7.81316
CYP1B1	1.61967	3.66549	2.41797	7.70313
SCT	2.03858	2.9545	2.60214	7.59521
PI16	3.5604	1.25801	2.77166	7.59007
SPRR2A	1.88605	4.47581	1.19586	7.55772
LYPD2	2.43208	2.28017	2.7618	7.47404
ITLN1	2.22908	2.62859	2.53971	7.39738
NCCRP1	3.65683	3.48712	0.248344	7.3923
OMD	0.980289	3.16461	3.14835	7.29325
HIGD1B	2.23333	2.32813	2.69243	7.25389
S100P	1.82957	2.8153	2.52806	7.17293
DNAAF1	2.81373	2.41209	1.89312	7.11894
CCL5	2.18995	2.5115	2.3939	7.09535
S100A2	2.06125	2.2669	2.76453	7.09268
IL13	1.34001	2.38767	3.34023	7.06791
KRT15	1.66521	2.03165	3.35183	7.04869
HIST1H4C	2.11341	1.98994	2.9266	7.02995
TFPI2	1.4848	2.03947	-3.45111	6.97538
C1QTNF3	1.7578	2.73299	2.47932	6.97011
PLAC9	2.22889	2.31622	2.38545	6.93056
RGS2	1.39768	1.77003	3.73636	6.90408
ADH1B	1.64999	2.71745	2.46247	6.8299
ANGPT2	2.30307	1.5069	2.99537	6.80533
CD14	1.65239	2.146	2.98634	6.78473
JSRP1	2.43959	3.27328	1.07142	6.78429
HP	2.37136	2.3288	2.07394	6.7741
IL1R2	1.32315	3.94436	-1.41557	6.68308
KLK12	2.31766	2.38113	1.90723	6.60602
CA2	1.91124	1.93486	2.75645	6.60254
CXCL5	1.08309	2.64393	2.8741	6.60113
LGALS2	0.630028	0.864289	5.10111	6.59543
RHCG	2.45546	0.964312	3.15267	6.57244
PSCA	2.40375	2.99973	1.16856	6.57204
CLCA2	2.18456	2.02721	2.31555	6.52732
ADH7	1.8474	2.37791	2.28669	6.512
FGA	2.27189	2.64538	1.57996	6.49723
TFF1	2.47333	1.18218	2.80365	6.45916
MUC20	2.14545	2.42318	1.87213	6.44075
CD24	2.0708	2.13123	2.15802	6.36005
MFAP5	2.36407	0.919581	3.03107	6.31472
CCDC80	1.69853	1.5544	3.05069	6.30362
LGALS7B	1.21645	1.35242	3.71793	6.28681
CCL22	1.72159	4.01959	-0.447646	6.18883
CCNB1	-0.0255459	4.6943	1.43466	6.15451
C15orf48	1.96127	1.92181	2.26963	6.15271
EFEMP1	1.64951	2.17741	2.32098	6.14791
DEFB4A	1.11842	2.94975	2.07837	6.14653
ID2	1.84798	2.02282	2.27191	6.14271
BCL2A1	1.74413	1.29715	3.07685	6.11813
SDS	-2.46862	-0.372813	3.25764	6.09907
KRT17	2.03527	2.2493	1.80763	6.0922
TRH	2.97986	3.08235	-0.00121516	6.06342
GPC3	1.76159	2.06405	2.2238	6.04944
CYP24A1	2.07678	1.58522	2.38475	6.04675
MGP	1.92858	2.10522	1.9829	6.0167
ITM2C	1.94272	1.97679	2.09314	6.01265
SOD3	1.9567	1.55974	2.48716	6.0036
ADIRF	1.93799	1.88085	2.15371	5.97255
PRSS23	1.41857	1.90701	2.64245	5.96803
FAM3D	0.878663	1.34623	3.70346	5.92835
INHBA	0.761457	2.13985	3.01892	5.92023
G0S2	2.01643	1.93834	1.96511	5.91988
UPK1B	1.98596	3.05639	0.874224	5.91658
WISP2	2.19266	0.996643	2.70886	5.89816
COL6A2	1.96871	1.71163	2.15457	5.83491
AQP3	1.60213	1.84204	2.37866	5.82283
C2orf40	1.69991	1.85578	2.225	5.78069
SLC35D3	1.86443	2.6897	1.15583	5.70996
ANGPTL4	1.86151	1.81211	2.0121	5.68572
MZB1	1.95902	2.0742	1.6334	5.66662
CLU	1.63186	2.13558	1.85943	5.62687
LUM	1.53531	2.18503	1.89945	5.61979
TUBB	1.88342	1.61185	2.10499	5.60026
PPBP	1.71663	1.67474	2.15606	5.54743
RARRES2	1.53504	2.26172	1.734	5.53076
KCNE4	1.38682	1.30773	2.80951	5.50407
SOD2	1.52007	1.34868	2.6254	5.49415
MT1H	1.19385	2.29553	2.00372	5.4931
EDNRB	1.24853	4.00749	0.227775	5.48379
TSPAN1	1.61392	2.22921	1.61697	5.46011
IL1RL1	1.91646	1.84867	1.57324	5.33837
PLN	1.85006	0.949354	2.53869	5.3381
CCL19	-0.208989	1.4318	3.6849	5.32569
CST1	1.7352	2.2302	-1.33208	5.29749
FCGR3A	1.82512	2.02531	1.42471	5.27514
TNFRSF17	0.683025	1.68597	2.88099	5.24999
HERPUD1	1.63418	1.29977	2.27826	5.21222
IGFBP6	1.61353	2.25748	1.31501	5.18602
KLRB1	1.49394	1.81864	1.8641	5.17668
GAS1	0.517659	1.64385	2.93328	5.09479
COX4I2	1.72634	1.74336	1.62447	5.09417
S100A12	1.38293	1.94405	1.76518	5.09216
NEFL	-1.28451	-1.11918	-2.65887	5.06256
IL22	-1.12043	-1.78842	-2.15188	5.06073
CRABP2	2.83534	1.70336	0.485246	5.02394
RTKN2	1.10222	2.28877	1.60653	4.99753
NKG7	1.62614	1.66467	1.69556	4.98637
HMGB3	1.57209	1.31822	2.09197	4.98228
SPRY1	1.54416	0.904452	2.52844	4.97705
CLEC9A	0.17968	4.61834	0.132171	4.93019
C1S	1.69777	1.36418	1.86523	4.92718
FCER1A	0.367082	2.62226	1.92491	4.91425
CD163	1.468	1.09924	2.34642	4.91366
SERPINF1	2.06347	1.20257	1.647	4.91304
TNFSF10	1.56893	1.49814	1.84022	4.90729
TAGLN	1.42283	1.70745	1.76848	4.89877
IL1B	1.58594	1.31963	1.98989	4.89546
CD55	1.22148	1.76768	1.88138	4.87055
HAMP	-0.306842	1.63136	2.9319	4.87011
CLEC3B	1.57255	1.72982	1.54611	4.84847
CHI3L1	-1.75261	-2.15123	-0.918806	4.82264
EPAS1	1.49997	1.62885	1.69286	4.82168
PIGR	1.18884	1.45508	2.15212	4.79604
GNLY	1.40826	1.57894	1.77929	4.76648
MSR1	1.09075	1.37012	2.29416	4.75503
POSTN	0.551045	-0.0979729	4.0878	4.73682
CFB	1.38976	1.50239	1.81297	4.70512
RGS1	1.59696	1.56755	1.5247	4.68921
CST6	1.11186	1.19916	2.37437	4.68538
CXCL11	0.992223	0.931922	2.75769	4.68183
MFAP4	1.47767	1.83241	1.35631	4.66639
PPP1R14A	1.76817	1.58731	1.29737	4.65286
CCNO	1.81708	2.19532	0.629143	4.64155
ACKR1	1.53012	1.49771	1.60443	4.63226
PLA2G7	2.93616	0.970638	-0.714312	4.62111
CLDN4	1.42113	2.23472	0.950718	4.60657
TUBB4B	1.68289	1.42321	1.49378	4.59988
TTR	-0.59415	-1.65803	-2.34513	4.59731
MMP7	-1.08942	-0.0879973	3.39499	4.5724
ERICH3	1.52365	1.16223	1.88612	4.57199
FAM107A	1.46941	1.61298	1.47789	4.56028
IGFBP5	0.911569	3.03815	-0.610274	4.55999
C3	0.858221	1.4132	2.24441	4.51583
ZG16B	1.6453	1.13319	1.69673	4.47521
PLAC8	0.901945	1.79234	1.77114	4.46542
CALY	0.397919	0.830156	3.16316	4.39123
MYC	0.330225	-0.518012	-3.54202	4.39026
IFITM1	0.978515	1.39428	2.0159	4.3887
STEAP4	1.64736	1.75501	0.975833	4.3782
MUC5AC	1.60933	1.58554	1.1636	4.35847
ROPN1L	1.21611	2.48914	0.636225	4.34148
ADH1C	1.02083	1.06871	2.25189	4.34142
GADD45B	1.38511	1.66367	1.28343	4.33221
CKB	1.47563	2.28647	0.564045	4.32615
CXCL10	0.462744	0.93306	2.91066	4.30647
SOX17	1.22278	1.49011	1.59086	4.30376
EGFL7	1.34496	1.33217	1.6134	4.29052
TSC22D1	1.5458	1.30423	1.43674	4.28677
DCN	1.53981	1.63987	1.09513	4.27481
CA4	1.33279	1.45669	1.44759	4.23707
CLDN10	1.63388	0.711332	1.89013	4.23534
HBB	2.15607	1.51367	0.549581	4.21932
EFCAB1	1.48922	1.73483	0.992802	4.21685
FABP6	1.26239	0.882416	2.05985	4.20466
TACSTD2	1.52838	1.52502	1.12364	4.17704
PRG4	-0.513422	2.80509	0.857001	4.17551
ALDH1A3	1.02201	1.36763	1.78106	4.1707
PTTG1	1.69173	1.17249	1.28829	4.15251
KLK11	1.37082	1.48766	1.28336	4.14184
CLEC14A	1.25357	1.50493	1.38216	4.14066
LTF	0.752712	1.50025	1.86797	4.12093
FAM92B	1.26577	1.30507	1.54803	4.11887
MUC4	1.85539	1.53625	0.726424	4.11806
DNAH5	1.2525	0.9038	1.95577	4.11207
NTS	1.27743	2.68979	-0.123875	4.09109
DES	1.29199	0.989957	1.78389	4.06583
MS4A2	1.2527	0.910757	1.89985	4.06331
NAMPT	0.833973	1.11892	2.10434	4.05724
CXCL2	1.09202	1.3567	1.60402	4.05274
CYP26A1	1.38702	1.44576	1.21016	4.04295
IER2	1.38261	1.08956	1.56187	4.03405
TNFAIP6	0.889166	1.99608	1.14026	4.02551
IGFBP7	1.30968	1.43708	1.25773	4.00449
HYAL2	1.23085	1.35112	1.42185	4.00382
DEFB1	1.04134	1.34039	1.60946	3.99118
RERGL	1.88843	1.71549	0.366958	3.97088
DKK1	-0.30507	1.8904	1.75743	3.95289
CCDC170	1.1036	1.05824	1.77292	3.93477
PLA2G2A	1.99409	0.571478	1.34792	3.91349
SFRP2	1.84261	1.11578	0.953016	3.9114
MS4A8	1.12067	1.31645	1.47228	3.90939
RHOB	1.19323	1.17653	1.52184	3.8916
ID1	1.24666	1.29412	1.34828	3.88907
SFTA1P	0.97053	1.58684	1.33119	3.88857
FCN3	1.34106	1.2692	1.27279	3.88304
PIFO	1.14351	1.22561	1.50668	3.87581
SERPINE1	0.512912	0.796272	-2.5625	3.87168
DNASE1L3	1.35959	1.69914	0.811587	3.87032
MUC1	1.10009	1.27552	-1.49055	3.86616
PRSS21	1.18122	0.953367	1.73069	3.86527
FBLN1	1.36528	1.37332	1.11738	3.85598
PILRA	0.984605	1.12253	1.73503	3.84216
TFRC	1.08154	1.01686	1.742	3.84039
RSPH9	1.20599	1.30667	1.31713	3.82979
EMP2	1.05254	1.22471	1.54832	3.82557
SLC44A4	1.05474	1.78014	0.980706	3.81558
C1orf194	1.18471	1.49019	1.12477	3.79967
FAM183A	1.27936	1.30139	1.2162	3.79695
C11orf88	1.28444	1.05914	1.44485	3.78843
SFN	1.24541	1.75691	0.785675	3.788
CAV1	1.13151	1.31979	1.33632	3.78762
PLAUR	1.13944	1.09059	1.55329	3.78333
COL1A1	1.56589	0.58892	1.60575	3.76056
PF4	0.987732	1.94545	0.812319	3.7455
FXYD3	1.31244	1.2674	1.157	3.73685
HAS1	1.28364	1.53967	0.897641	3.72095
TIMP1	1.36785	1.63591	0.707344	3.71111
PRF1	1.35819	1.28282	1.06496	3.70597
CCDC78	1.19188	1.24653	1.26309	3.70151
FKBP11	0.666688	1.7357	1.29717	3.69955
CALD1	1.34727	1.50761	0.841875	3.69676
ADM	1.18723	1.15993	1.33613	3.68329
TM4SF1	0.903914	1.28091	1.49212	3.67694
FOS	0.818329	1.37005	1.48698	3.67536
CCL21	1.18861	1.23539	1.24284	3.66684
WFDC12	1.22289	1.10489	1.32585	3.65364
DIRAS3	0.940094	0.87127	1.83878	3.65015
CX3CL1	0.642391	1.41074	1.58381	3.63694
CEACAM6	1.11282	1.42239	1.09941	3.63462
CCL7	1.55823	0.936219	1.13306	3.62751
CYP4B1	0.900778	1.15647	1.57018	3.62743
TMEM190	1.08461	1.77677	0.763461	3.62484
CXCL14	0.834093	1.49833	1.28948	3.6219
HMGB1	1.05781	1.06111	1.43686	3.55578
TSPAN8	1.21344	0.968311	1.36473	3.54648
AGR3	0.900964	1.11751	1.52364	3.54212
SPAG6	1.31573	1.23521	0.980129	3.53107
SOX4	1.19761	0.932207	1.39965	3.52947
UTS2	1.00416	0.787315	1.73498	3.52645
TMEM45A	0.992155	1.33319	1.20009	3.52544
CCL20	1.09203	1.15628	1.2492	3.49752
ODF3B	1.0466	1.02504	1.41375	3.4854
KRT18	1.12674	1.12311	1.23067	3.48052
C9orf116	1.0295	1.59596	0.851594	3.47705
S100A9	1.22187	1.05783	1.17752	3.45722
PTX3	1.33096	0.898793	1.22284	3.4526
HMGB2	1.16698	0.905986	1.36531	3.43828
IGLL5	1.15686	1.14005	1.1134	3.41031
SOCS3	0.932123	1.00858	1.46856	3.40927
HS3ST1	0.852456	0.612627	1.9384	3.40348
PRR4	1.1859	1.09992	1.10276	3.38858
S100A14	1.31655	0.990698	1.0797	3.38695
APOE	1.01686	1.01773	1.35161	3.38619
EMP1	1.10176	0.800246	1.47773	3.37973
DYNLRB2	1.27805	1.14338	0.956094	3.37753
STMN1	1.18627	1.09885	1.08569	3.37081
TCTEX1D2	1.13105	1.13934	1.09613	3.36652
KRT7	1.04899	1.35104	0.958033	3.35805
C11orf97	1.04142	0.919147	1.39396	3.35452
RETN	0.97856	1.03103	1.33909	3.34868
NTM	1.32643	1.84491	-0.176727	3.34807
TPM2	1.09545	1.31141	0.940761	3.34762
SST	0.865295	1.0119	1.46946	3.34665
CYR61	0.885689	1.8132	0.640576	3.33946
ATP13A4-AS1	1.0927	0.973735	1.26731	3.33375
AGR2	1.19288	1.49301	0.644936	3.33083
CXCL16	0.968973	0.948827	1.40669	3.32449
MSMB	1.10925	1.08949	1.12572	3.32447
PRH2	1.14722	1.91603	0.255859	3.31911
KYNU	0.884096	0.976246	1.45051	3.31085
SYT8	0.618874	0.29503	2.39227	3.30617
HMGN2	0.986773	1.12984	1.1866	3.30321
CTXN1	1.0414	1.32509	0.931318	3.29781
SLC9A3R2	0.948391	1.08822	1.25103	3.28764
SAA2	1.20397	1.02843	1.04988	3.28228
CES1	1.07873	1.10816	1.08765	3.27453
CEBPB	0.966977	0.921757	1.35903	3.24776
C5orf49	1.10216	1.0898	1.04155	3.23351
LDLRAD1	1.00461	1.28463	0.944104	3.23334
CSTA	0.956349	1.02104	1.24549	3.22288
FCER1G	0.94323	1.01975	1.25493	3.21792
CLDN3	0.957511	1.39021	0.855469	3.20319
APOD	1.44765	1.045	0.695282	3.18794
C19orf33	1.20166	0.927553	1.05689	3.18611
CFAP126	1.12027	1.13684	0.923111	3.18022
CLC	0.0456397	-1.50582	-1.62429	3.17575
MDK	0.96725	1.01168	1.19503	3.17395
SERPINA3	0.841881	0.391532	1.9364	3.16982
CD52	1.02071	0.944437	1.18704	3.15218
TIMP3	0.923783	1.04428	1.18045	3.14852
PLAT	0.554098	0.881972	1.70498	3.14105
LCN2	1.01288	1.08229	1.03965	3.13482
DNAH12	1.15861	0.943464	1.02809	3.13017
FOXJ1	1.04358	1.13086	0.955261	3.1297
RGS16	1.14326	1.27506	0.709617	3.12794
C9orf24	1.15592	1.04321	0.927692	3.12682
SERPINB11	1.14236	1.441	0.533712	3.11707
TMC5	0.932225	0.991352	1.1835	3.10708
TMEM100	0.95535	1.11135	1.02258	3.08928
CH25H	1.05106	0.74354	1.29037	3.08497
PCSK1N	0.747366	1.70393	0.624351	3.07565
PIP	0.843705	0.602887	1.62712	3.07371
SPP1	2.14526	-0.093988	0.834118	3.07337
WDR38	1.19377	1.1153	0.76263	3.0717
SERPINB2	-0.309488	-1.42946	1.30631	3.04525
MGST1	0.965791	1.04507	1.03292	3.04378
RRAD	1.26235	1.06571	0.709573	3.03763
ELF3	1.07814	1.06808	0.887623	3.03384
TCN1	1.16095	1.01019	0.855684	3.02683
KRT19	1.02539	1.12862	0.852409	3.00642
SERPINB4	0.625052	0.408688	1.97064	3.00438
PTGDS	1.18922	0.450989	1.36032	3.00053
RNASE1	0.791166	1.22959	0.973217	2.99397
CXCL8	1.43845	0.800231	-0.754916	2.9936
GEM	1.01476	1.24369	0.731999	2.99046
C1R	1.30426	1.18519	0.486522	2.97597
OLR1	0.978296	0.952398	1.04436	2.97506
FGFBP1	-0.362485	-0.560721	2.05031	2.97351
ZMYND10	1.1105	1.24061	0.619598	2.97071
FCGBP	1.15191	1.09822	0.719271	2.96941
ADAMTS1	-0.127538	1.48071	1.35409	2.96233
OGN	1.24	0.515999	-1.19557	2.95156
LRRC46	0.929174	1.1003	0.916622	2.9461
SAA1	1.06614	0.944318	0.931363	2.94182
HSP90B1	0.92667	0.913528	1.09985	2.94005
TPSB2	0.964978	1.03334	0.940596	2.93891
LSP1	0.98339	0.835967	1.11294	2.9323
SERPINB3	0.893779	0.493986	1.53858	2.92635
A2M	0.98979	0.59165	1.33804	2.91948
MED24	0.763433	0.782047	1.36927	2.91475
HOPX	0.897725	0.929635	1.08734	2.9147
CYP2F1	0.838396	0.775544	1.29908	2.91302
MEDAG	1.53543	1.0812	0.293342	2.90998
MYL9	0.996757	1.05991	0.851056	2.90772
KLK10	1.14113	0.937904	0.818119	2.89715
BGN	1.15393	1.0999	0.642163	2.89599
ACTA2	0.997936	1.03058	0.860897	2.88942
CCDC17	0.965207	1.05439	0.866854	2.88646
CEBPD	0.865107	0.650319	1.37018	2.88561
SFTPB	0.954021	0.929479	1.00209	2.88559
CAPS	1.09507	0.973811	0.816295	2.88517
CD59	0.894543	0.983258	1.00579	2.88359
HLA-E	0.846271	0.856549	1.18039	2.88321
SMIM22	1.00101	1.40676	0.470083	2.87785
CPE	0.959431	0.897297	1.01236	2.86909
LYAR	0.899813	1.00774	0.957266	2.86482
CAPSL	1.02753	1.01465	0.822059	2.86424
C20orf85	1.02981	0.978334	0.839259	2.8474
NEAT1	0.918685	0.933278	0.994798	2.84676
SPI1	0.829946	0.952288	1.06389	2.84613
CDHR3	0.960546	1.10932	0.77593	2.84579
PCOLCE2	0.963449	0.96366	0.911524	2.83863
RSPH1	0.943857	0.979425	0.914899	2.83818
SLC6A14	0.919388	0.970498	0.928607	2.81849
EMP3	0.89356	0.866345	1.05806	2.81797
CTSH	0.863385	0.930766	1.0159	2.81005
TXN	0.843777	0.889401	1.07421	2.80739
CTSG	0.418981	1.24456	1.14323	2.80676
CD9	0.839085	0.987207	0.977747	2.80404
FABP4	0.955615	0.939705	0.907759	2.80308
THBS1	0.540004	1.18104	1.07271	2.79376
PDLIM1	0.922361	0.886639	0.981183	2.79018
C6orf58	0.924167	0.889233	0.975156	2.78856
MGST3	0.893557	0.911437	0.977918	2.78291
C16orf89	0.908029	0.924289	0.945621	2.77794
EZR	0.927802	0.714741	1.13197	2.77452
MT1E	0.926511	0.901112	0.94601	2.77363
CXCL17	0.960869	0.921355	0.887621	2.76985
ANXA1	0.901044	0.899338	0.962018	2.7624
TPPP3	0.792479	0.713875	1.25327	2.75962
MORN2	0.787477	1.02064	0.951102	2.75922
MS4A7	0.903428	0.963046	0.892119	2.75859
BSG	0.951	0.917707	0.888731	2.75744
DYNLL1	0.847204	0.843809	1.06396	2.75498
XBP1	0.878916	0.969882	0.905277	2.75408
SCD	0.977645	0.979635	0.794611	2.75189
TSC22D3	0.940987	0.917053	0.893509	2.75155
NAPSA	0.908629	0.913856	0.928219	2.7507
FDCSP	0.616324	1.19564	0.93848	2.75045
PERP	1.07599	0.676476	0.995018	2.74748
IFITM3	0.848452	0.824848	1.07157	2.74487
VSIG4	0.915484	0.916141	0.913171	2.7448
S100A4	0.950979	0.893503	0.890525	2.73501
PCOLCE	1.47749	0.714071	0.537476	2.72904
CD37	0.833138	0.948864	0.945477	2.72748
TREM2	0.90203	1.05856	0.765448	2.72603
TUBA1A	0.898593	0.934931	0.888411	2.72193
DMBT1	0.837479	0.941698	0.941301	2.72048
C4BPA	1.18303	0.814306	0.722609	2.71994
JUN	0.822454	0.834713	1.06139	2.71855
LDHB	0.909725	0.922527	0.884479	2.71673
SELENBP1	0.900784	0.923205	0.885803	2.70979
LYZ	0.897607	0.848052	0.963397	2.70906
HLA-DQB2	0.777397	0.911401	1.01764	2.70644
HLA-DQB1	0.850725	0.867971	0.98581	2.70451
TMEM176B	0.904607	0.961855	0.835968	2.70243
C9orf135	1.02046	0.989664	0.677313	2.68744
FAM216B	0.827122	1.14932	0.704819	2.68126
IL7R	0.992074	0.98522	0.70349	2.68078
GSTP1	0.865285	0.845097	0.966368	2.67675
MT1G	0.825213	0.92355	0.926066	2.67483
HSP90AB1	0.810125	0.837263	1.02649	2.67388
GCHFR	0.900224	0.912127	0.854832	2.66718
S100A1	1.54394	0.309757	-0.807765	2.66146
PDZK1IP1	0.868479	0.903045	0.888856	2.66038
APOBEC3A	1.20324	0.585234	0.871808	2.66028
CCL23	1.03403	0.832994	0.79231	2.65933
DSTN	0.873997	0.86974	0.913661	2.6574
TPSAB1	0.996954	0.976556	0.681787	2.6553
MORN5	1.02982	0.79677	0.822315	2.64891
LPL	0.893805	0.920801	0.823366	2.63797
MCEMP1	0.911158	0.862146	0.864616	2.63792
SFTPD	0.874604	0.872301	0.883405	2.63031
ACP5	0.885807	0.834306	0.909955	2.63007
HLA-DQA2	0.848562	0.820491	0.946385	2.61544
MS4A4A	0.854514	0.86669	0.892591	2.6138
NFKBIA	0.898797	0.876361	0.828449	2.60361
STXBP2	0.850533	0.830192	0.922792	2.60352
ADAMTS4	0.476683	1.27615	0.850073	2.60291
SCPEP1	0.867591	0.856472	0.874446	2.59851
RPL10A	0.857188	0.857157	0.880581	2.59493
SFTPA1	0.849464	0.865877	0.87739	2.59273
GMFG	0.849391	0.846304	0.894628	2.59032
MYOC	0.877467	0.995338	0.717353	2.59016
PGC	0.860561	0.869763	0.857946	2.58827
LPO	0.902899	0.838986	0.844919	2.5868
XCL2	0.944321	1.07192	0.570163	2.58641
BPIFB1	0.830223	0.856553	0.895799	2.58257
H2AFZ	0.898274	0.804269	0.874873	2.57742
RPS27L	0.791439	0.804587	0.976936	2.57296
SAT1	0.882138	0.81262	0.875852	2.57061
TKT	0.863483	0.852388	0.853505	2.56938
CITED2	0.878294	0.833444	0.857137	2.56887
LINC00342	0.706534	0.819961	1.03988	2.56638
CFAP53	1.03715	1.05479	0.473127	2.56507
MRC1	0.981281	0.761226	0.820955	2.56346
AREG	0.748551	0.719877	1.09497	2.5634
CYB5A	0.886764	0.857277	0.817593	2.56163
LAPTM5	0.785431	0.837545	0.93839	2.56137
BPIFA1	0.962827	0.953706	0.642101	2.55863
SPRR2D	0.36878	0.383685	1.80306	2.55553
PRDX5	0.869026	0.856955	0.828926	2.55491
ITM2B	0.821802	0.801226	0.931541	2.55457
LRRFIP1	0.824206	0.843327	0.886401	2.55393
C1orf162	0.842901	0.817646	0.892322	2.55287
POMP	0.831858	0.827438	0.89078	2.55008
RPLP0	0.825019	0.832846	0.891364	2.54923
RPL13	0.838784	0.845106	0.86447	2.54836
ATP1B1	0.846878	0.852475	0.845559	2.54491
SFTA2	0.848677	0.841883	0.853687	2.54425
CD68	0.839741	0.84638	0.856693	2.54281
KRT8	0.928922	0.946124	0.667488	2.54253
NOP10	0.835358	0.826531	0.879929	2.54182
ZFP36	0.823556	0.88978	0.828163	2.5415
WIF1	0.829141	0.920373	0.790406	2.53992
SSR4	0.819339	0.844692	0.874347	2.53838
PEBP4	0.837376	0.846173	0.854734	2.53828
RPS2	0.833948	0.842446	0.861665	2.53806
RARRES1	0.746146	1.01974	0.765668	2.53156
S100A8	0.832598	0.820829	0.874472	2.5279
RAMP2	0.816553	0.905135	0.805617	2.52731
SLC25A6	0.836658	0.842622	0.847971	2.52725
SDC4	0.871432	0.808561	0.846887	2.52688
RPS6	0.850673	0.836814	0.839147	2.52663
LGALS3BP	0.83719	0.846843	0.839708	2.52374
UBC	0.834008	0.797484	0.890367	2.52186
GNG11	0.914885	0.769616	0.835436	2.51994
TMEM59	0.828448	0.820851	0.869258	2.51856
SNX10	0.835387	0.937204	0.744864	2.51746
FOLR1	0.827957	0.826953	0.858746	2.51366
SERPINA1	0.843007	0.759119	0.910376	2.5125
SH3BGRL	0.808055	0.826056	0.875624	2.50974
CTSD	0.855968	0.858273	0.79481	2.50905
RPL22	0.812764	0.826472	0.869785	2.50902
RPL7	0.82599	0.843087	0.839532	2.50861
MARCO	0.875854	0.847761	0.783179	2.50679
HLA-DPB1	0.799226	0.842294	0.8651	2.50662
SFTA3	0.844549	0.817805	0.84083	2.50318
RPL3	0.845114	0.839148	0.818616	2.50288
S100A10	0.864389	0.82266	0.812868	2.49992
F3	0.645054	0.608552	1.24505	2.49865
RPS12	0.818992	0.824747	0.8523	2.49604
PPIA	0.823646	0.807224	0.864773	2.49564
RPL17	0.802829	0.798667	0.894031	2.49553
SLC25A5	0.802146	0.832503	0.860341	2.49499
RPS14	0.817022	0.825283	0.85052	2.49283
RBP4	0.800492	0.881139	0.810403	2.49203
RPS18	0.831618	0.836279	0.823843	2.49174
DBI	0.787317	0.827703	0.876367	2.49139
HLA-DQA1	0.773498	0.885336	0.831475	2.49031
CLDN7	0.844477	0.823238	0.818884	2.4866
RPS3	0.820115	0.832251	0.834221	2.48659
RPL18	0.818503	0.820479	0.846904	2.48589
RPL23A	0.820152	0.810897	0.853486	2.48454
ALDH2	0.833246	0.817207	0.833936	2.48439
AK1	0.821273	0.820549	0.842377	2.4842
IGFBP2	0.910849	0.808058	0.764466	2.48337
C1QA	0.857252	0.829392	0.795692	2.48234
RPL5	0.831246	0.825279	0.82572	2.48225
ALDH1A1	0.848213	0.873727	0.758815	2.48076
RPL34	0.813945	0.822579	0.843615	2.48014
RND1	0.816578	0.817058	0.846254	2.47989
NPC2	0.815854	0.80498	0.858863	2.4797
MYL12B	0.829873	0.836873	0.812044	2.47879
RPL24	0.827155	0.815225	0.835796	2.47818
RPL14	0.812499	0.817671	0.847071	2.47724
VMO1	0.844958	0.820527	0.811325	2.47681
SLC34A2	0.79527	0.771798	0.909401	2.47647
KLF5	0.758279	0.731385	0.986623	2.47629
PRR13	0.811121	0.823052	0.840059	2.47423
PRB3	1.01611	0.828679	0.627211	2.472
LDHA	0.826206	0.858481	0.787039	2.47173
COX7C	0.803003	0.801155	0.866603	2.47076
RTN4	0.851959	0.83483	0.783487	2.47028
S100A3	0.563925	1.24427	-0.659256	2.46745
ASAH1	0.785075	0.848158	0.834212	2.46744
FDX1	0.8478	0.843967	0.775086	2.46685
TXNIP	0.834174	0.807942	0.823921	2.46604
RPL13A	0.818893	0.816171	0.830461	2.46552
WFDC2	0.830424	0.826672	0.807567	2.46466
COMT	0.851462	0.808056	0.803191	2.46271
NPM1	0.818346	0.80585	0.837709	2.4619
TAGLN2	0.822076	0.825814	0.812439	2.46033
PSME2	0.798245	0.816852	0.845063	2.46016
HLA-DMA	0.80206	0.836314	0.821013	2.45939
CNN1	1.2125	0.385428	0.859477	2.45741
EEF1G	0.827057	0.813658	0.816337	2.45705
RPL27A	0.816258	0.818993	0.821677	2.45693
ALOX5	0.813862	0.852587	0.790347	2.4568
RPS15A	0.806786	0.805492	0.844133	2.45641
TMBIM6	0.824741	0.82806	0.802656	2.45546
MT1M	0.839176	0.768707	0.847479	2.45536
RPS7	0.810755	0.804581	0.839166	2.4545
HSPA8	0.773018	0.750535	0.930214	2.45377
IFI27	0.845898	0.82921	0.778622	2.45373
RPS8	0.800985	0.815281	0.837034	2.4533
MT1A	0.725515	0.915169	0.811853	2.45254
SLC7A7	0.83717	0.815906	0.799096	2.45217
TUBA1B	0.830875	0.828415	0.792865	2.45216
RPL9	0.819265	0.818085	0.814677	2.45203
RPL31	0.817627	0.812561	0.821664	2.45185
LGALS3	0.828404	0.795894	0.82677	2.45107
ARPC5	0.805353	0.813614	0.831628	2.45059
GSN	0.805648	0.817969	0.826577	2.45019
RPL35A	0.818797	0.811305	0.820025	2.45013
ARPC2	0.809322	0.821654	0.818628	2.4496
CHI3L2	0.815725	0.82036	0.812435	2.44852
HLA-DPA1	0.798307	0.827515	0.822519	2.44834
ARPC1B	0.80386	0.805569	0.837715	2.44714
DECR1	0.822616	0.823649	0.799996	2.44626
SDCBP	0.848676	0.791627	0.80579	2.44609
RPL10	0.8211	0.815401	0.809416	2.44592
COX4I1	0.797714	0.803229	0.844214	2.44516
C9orf16	0.81554	0.812091	0.816674	2.44431
HEXA	0.812461	0.780739	0.849351	2.44255
TYROBP	0.855719	0.808534	0.777679	2.44193
RPS5	0.80533	0.811272	0.8248	2.4414
RPS4X	0.830171	0.804927	0.805076	2.44017
VIM	0.833332	0.793427	0.813234	2.43999
MT2A	0.762242	0.799756	0.875008	2.43701
HNRNPA1	0.82385	0.821915	0.791079	2.43684
CCL13	-0.736492	-0.670031	-1.02791	2.43443
CD74	0.793743	0.825939	0.813436	2.43312
RPS27	0.779575	0.786031	0.866166	2.43177
SFTPA2	0.810473	0.80972	0.810111	2.4303
ARL6IP1	0.838559	0.803971	0.787655	2.43018
C11orf96	0.996424	0.73132	0.701125	2.42887
RPS26	0.835043	0.812141	0.780948	2.42813
S100A6	0.805706	0.793225	0.828941	2.42787
ATP6V1F	0.804106	0.809087	0.814465	2.42766
RPS29	0.790893	0.799057	0.837021	2.42697
RPL32	0.79532	0.795364	0.836019	2.4267
CLIC1	0.803848	0.795295	0.827438	2.42658
XCL1	1.02942	1.05635	0.340405	2.42618
RPL8	0.804065	0.804774	0.816986	2.42583
RPL38	0.803049	0.802878	0.81988	2.42581
UBB	0.811935	0.801722	0.811648	2.42531
CD53	0.794368	0.757145	0.872631	2.42414
ARPC3	0.796891	0.802508	0.824683	2.42408
RPS17	0.812851	0.806475	0.804215	2.42354
S100A11	0.817745	0.799699	0.80447	2.42191
EEF1B2	0.808259	0.793587	0.81889	2.42074
RPL12	0.790826	0.791554	0.837247	2.41963
LAMP1	0.815735	0.809688	0.793856	2.41928
DUSP1	0.813946	0.813296	0.790597	2.41784
LAMTOR1	0.815436	0.821746	0.780641	2.41782
UQCRB	0.798477	0.797251	0.821936	2.41766
RPL27	0.793604	0.804424	0.818528	2.41656
HMGN3	0.822112	0.820653	0.773705	2.41647
APOC1	0.843364	0.800917	0.772188	2.41647
RPL30	0.784189	0.78722	0.843361	2.41477
CYP27A1	0.849491	0.850088	0.714905	2.41448
MIF	0.810114	0.811352	0.792725	2.41419
RPS9	0.808174	0.801251	0.803214	2.41264
CALM2	0.809645	0.80452	0.797063	2.41123
RPS25	0.798636	0.804917	0.80749	2.41104
RPL4	0.805507	0.801357	0.803109	2.40997
ACTB	0.77972	0.797519	0.832157	2.4094
H3F3B	0.811962	0.807525	0.788439	2.40793
ATP6V0C	0.819273	0.806834	0.781516	2.40762
MALAT1	0.801971	0.817011	0.787655	2.40664
RPS3A	0.803971	0.801026	0.800763	2.40576
HLA-DMB	0.781092	0.789143	0.835342	2.40558
ENO1	0.794557	0.819663	0.79073	2.40495
EIF1	0.808765	0.812025	0.782988	2.40378
RPL36AL	0.789821	0.796822	0.817045	2.40369
GAPDH	0.803537	0.790265	0.808675	2.40248
ZFP36L1	0.789342	0.82819	0.784491	2.40202
IFI6	0.80264	0.796813	0.801664	2.40112
CYBB	0.85279	0.823183	0.72465	2.40062
FN1	0.867491	0.814478	0.718029	2.4
RGCC	0.876892	0.81907	0.703724	2.39969
RPS27A	0.799474	0.792954	0.806732	2.39916
RPL7A	0.798049	0.79904	0.80149	2.39858
RPL11	0.796222	0.796691	0.80566	2.39857
SH3BGRL3	0.792163	0.787503	0.818209	2.39788
RPL26	0.813921	0.813591	0.769955	2.39747
PLD3	0.82817	0.821143	0.74807	2.39738
RPL19	0.792329	0.796379	0.808154	2.39686
BTF3	0.80648	0.800575	0.789662	2.39672
CRIP1	0.822252	0.849567	0.724157	2.39598
HLA-DRB5	0.80148	0.802652	0.791631	2.39576
RPL6	0.802349	0.795503	0.797768	2.39562
LGALS1	0.785442	0.789436	0.820642	2.39552
PTMA	0.801999	0.806034	0.786686	2.39472
SLPI	0.753417	0.777997	0.863052	2.39447
CCL2	0.801155	0.992104	0.601101	2.39436
SNX2	0.804021	0.831598	0.758552	2.39417
SCG5	-0.421295	-0.844322	-1.12587	2.39149
RPS20	0.790895	0.797585	0.801157	2.38964
PPDPF	0.770022	0.802934	0.815307	2.38826
UBD	0.65692	1.20281	0.526494	2.38623
RAC1	0.813209	0.797345	0.775434	2.38599
RPL21	0.803006	0.798861	0.783446	2.38531
IL6	0.727062	0.416801	1.24124	2.38511
CDC42	0.793224	0.802002	0.789762	2.38499
REEP5	0.804175	0.791351	0.788667	2.38419
CHCHD2	0.791389	0.783484	0.807703	2.38258
HSP90AA1	0.840416	0.79476	0.747115	2.38229
RPL37A	0.790155	0.786221	0.805791	2.38217
MYL12A	0.795423	0.799429	0.787139	2.38199
NACA	0.798138	0.786462	0.796649	2.38125
PSMA6	0.779546	0.78476	0.816904	2.38121
CD63	0.807818	0.796659	0.776516	2.38099
NDUFA4	0.792075	0.800995	0.787467	2.38054
RPSA	0.79721	0.80305	0.780038	2.3803
UQCR11	0.780029	0.79587	0.803227	2.37912
COTL1	0.786558	0.791591	0.799373	2.37752
AKR1B1	0.815333	0.840514	0.720369	2.37622
RHOA	0.800756	0.794089	0.780964	2.37581
LST1	0.75527	0.780958	0.838731	2.37496
RPS23	0.780771	0.781486	0.812201	2.37446
RPL29	0.788355	0.797492	0.788197	2.37404
HINT1	0.791817	0.802335	0.779323	2.37347
RPS24	0.788948	0.788747	0.793631	2.37133
RPLP2	0.777084	0.791728	0.802481	2.37129
PRH1	0.47931	0.536786	1.35409	2.37019
RPL15	0.792122	0.792078	0.785424	2.36962
RPL18A	0.790928	0.787737	0.790874	2.36954
GPX4	0.780061	0.787997	0.800021	2.36808
PRDX1	0.789186	0.785462	0.792785	2.36743
RPL35	0.792998	0.789271	0.785125	2.36739
HLA-DRB1	0.775996	0.810268	0.777716	2.36398
HCK	0.793861	0.776393	0.792177	2.36243
ATP6V0E1	0.773781	0.800257	0.787971	2.36201
PEBP1	0.790103	0.793543	0.778141	2.36179
ACTG1	0.793844	0.792194	0.775571	2.36161
COX6C	0.751782	0.782782	0.827011	2.36158
APLP2	0.794045	0.791553	0.775527	2.36112
CAP1	0.713978	0.813147	0.833105	2.36023
MMP9	0.648119	0.0813569	1.63073	2.36021
LTA4H	0.801428	0.782282	0.775877	2.35959
RPS15	0.780526	0.782756	0.795477	2.35876
OAZ1	0.780327	0.784683	0.793705	2.35872
HSPB1	0.766517	0.778266	0.812672	2.35746
SERPING1	0.818992	0.834821	0.702798	2.35661
LMNA	0.794483	0.850651	0.711444	2.35658
RPL36	0.781059	0.784033	0.791072	2.35616
RNH1	0.794655	0.793523	0.766088	2.35427
COX7A2	0.791462	0.779682	0.782305	2.35345
CAPG	0.82219	0.794227	0.73571	2.35213
CLDN5	0.798818	0.79205	0.761071	2.35194
BCAP31	0.794634	0.798095	0.757474	2.3502
TSPAN19	0.882454	0.981058	0.486571	2.35008
GLUL	0.815375	0.767765	0.766763	2.3499
CIB1	0.783615	0.782531	0.783375	2.34952
RPLP1	0.779572	0.785768	0.783942	2.34928
RPS16	0.796894	0.789288	0.762801	2.34898
COX5B	0.765788	0.785587	0.797136	2.34851
CTSL	0.852643	0.763515	0.732351	2.34851
RPS28	0.777768	0.773861	0.79675	2.34838
C1QC	0.82815	0.818364	0.700047	2.34656
NDUFS5	0.760999	0.781726	0.803345	2.34607
CALM1	0.802955	0.785841	0.756902	2.3457
PSMA7	0.787354	0.794085	0.763073	2.34451
FAU	0.776559	0.783523	0.784159	2.34424
RPL39	0.772579	0.766367	0.803929	2.34288
RPS21	0.771662	0.769585	0.796482	2.33773
CYBA	0.79332	0.747928	0.796365	2.33761
LY6E	0.816788	0.77423	0.74637	2.33739
LRPAP1	0.781663	0.789976	0.76566	2.3373
TMSB10	0.77928	0.7821	0.775832	2.33721
TPT1	0.780867	0.778659	0.776042	2.33557
GPNMB	0.808613	0.809046	0.717101	2.33476
RPS13	0.770152	0.769456	0.79492	2.33453
SRP14	0.787989	0.784326	0.76117	2.33349
CXCL6	-0.30351	-0.494255	-1.53178	2.32954
SERF2	0.776299	0.778729	0.774447	2.32948
EEF1A1	0.773674	0.773359	0.779873	2.32691
RPL41	0.76871	0.775264	0.782516	2.32649
HLA-DRA	0.787948	0.778672	0.759331	2.32595
DNASE2	0.757035	0.779004	0.789688	2.32573
UBA52	0.778779	0.774962	0.771963	2.3257
SCGB2A1	0.79758	0.906772	0.61982	2.32417
C1QB	0.798918	0.803068	0.721695	2.32368
CSTB	0.768295	0.790361	0.763594	2.32225
ANXA2	0.789632	0.76546	0.76623	2.32132
CETN2	0.958841	0.795368	0.565677	2.31989
CTSC	0.762413	0.788779	0.768269	2.31946
BCAM	0.895482	0.711161	0.710565	2.31721
ANXA5	0.785221	0.791254	0.7393	2.31577
TALDO1	0.789695	0.778107	0.747837	2.31564
YBX1	0.768087	0.77913	0.767596	2.31481
FAM229B	0.817814	1.37862	0.118103	2.31454
RPS19	0.761177	0.774781	0.777266	2.31322
MALL	0.770649	0.819216	0.72098	2.31084
COX6B1	0.75989	0.765837	0.784426	2.31015
ALDOA	0.762511	0.772391	0.773666	2.30857
SEC11C	0.746636	0.82363	0.73794	2.30821
CTSZ	0.788367	0.783728	0.733747	2.30584
PYCARD	0.782961	0.781832	0.737479	2.30227
PKM	0.767716	0.77899	0.754441	2.30115
ATP6V0D1	0.783327	0.792923	0.724485	2.30074
VAMP8	0.785107	0.768027	0.747294	2.30043
RPS11	0.774347	0.761708	0.764281	2.30034
SNX3	0.783792	0.775495	0.739387	2.29867
PABPC1	0.747518	0.771014	0.778787	2.29732
HCST	0.757552	0.710503	0.828021	2.29608
RPL37	0.772129	0.76745	0.756415	2.29599
PFN1	0.762905	0.781914	0.750205	2.29502
GLRX	0.819835	0.785705	0.68556	2.2911
HEXB	0.754988	0.760351	0.775552	2.29089
KRTAP3-1	0.836785	0.68087	0.77055	2.2882
PLBD1	0.795408	0.77081	0.7202	2.28642
HLA-C	0.775887	0.759877	0.749134	2.2849
XAGE2	0.812044	0.824026	0.645548	2.28162
YWHAH	0.755333	0.762167	0.761198	2.2787
FKBP1A	0.765074	0.78225	0.730614	2.27794
GABARAP	0.762831	0.759136	0.754208	2.27618
CFL1	0.772671	0.772375	0.730276	2.27532
MDH1	0.751134	0.77765	0.74497	2.27375
MYL6	0.766277	0.779861	0.726857	2.27299
GDF15	-0.0184317	-0.845804	1.40875	2.27298
GZMB	0.839799	0.747154	0.685939	2.27289
TSPO	0.791779	0.769617	0.710065	2.27146
ALDH3A1	0.980124	0.820734	0.470259	2.27112
IGSF6	0.825022	0.771102	0.673713	2.26984
ATP6V0B	0.772436	0.75366	0.743439	2.26954
RPL28	0.737047	0.728234	0.798325	2.26361
PLIN2	0.908547	0.870085	0.484728	2.26336
RMDN3	0.808742	0.782582	0.671368	2.26269
RPL23	0.798202	0.752243	0.709157	2.2596
LILRB4	0.855934	0.799019	0.604371	2.25932
PFDN5	0.760092	0.753895	0.742999	2.25699
HLA-B	0.761136	0.759717	0.735989	2.25684
CTSB	0.802085	0.788914	0.665143	2.25614
CHGA	-0.876324	-0.58804	0.791346	2.25571
HSPA1A	0.551185	0.307288	-1.39678	2.25525
GSTO1	0.794862	0.760823	0.697234	2.25292
LAMP2	0.774949	0.738557	0.738188	2.25169
SRGN	0.76314	0.742827	0.743553	2.24952
TNIP3	0.703596	0.612255	0.931181	2.24703
SFTPC	0.751823	0.75042	0.742241	2.24448
PSAP	0.75736	0.728421	0.757779	2.24356
CCT2	0.754414	0.777287	0.711199	2.2429
AP2S1	0.760105	0.762064	0.716189	2.23836
SARAF	0.760126	0.748268	0.72598	2.23437
PGK1	0.743801	0.741289	0.745126	2.23022
ICAM1	0.728462	1.09516	0.403726	2.22735
BRI3	0.761398	0.744096	0.712912	2.21841
GLIPR2	0.793225	0.750088	0.674812	2.21812
ATP1B3	0.716016	0.745335	0.749862	2.21121
ASCL3	-0.603804	-0.534541	1.07238	2.21073
GRN	0.761506	0.749604	0.697673	2.20878
TM4SF4	0.865146	0.750104	0.586205	2.20145
CFD	0.789482	0.782018	0.6276	2.1991
FBP1	0.814437	0.764528	0.619903	2.19887
NCOA7	0.794833	0.792811	0.611096	2.19874
ARHGDIB	0.754903	0.729398	0.713007	2.19731
HLA-A	0.762609	0.767246	0.667314	2.19717
CTSA	0.763193	0.742143	0.689998	2.19533
TYMP	0.769131	0.736061	0.681485	2.18668
CD27	0.105552	0.0427212	2.03664	2.18491
CTSS	0.737991	0.736458	0.702476	2.17693
CXCL1	0.830352	0.529591	0.814275	2.17422
SNTN	0.895759	0.781179	0.494513	2.17145
CP	0.735317	0.770752	0.663851	2.16992
CCL11	1.03799	0.629896	0.499481	2.16736
TREM1	0.871061	0.688639	0.607085	2.16678
EDN2	0.601398	1.10562	0.458504	2.16552
CXCR4	0.106981	-0.19302	-1.85999	2.15999
ISG15	0.662761	0.720517	0.774715	2.15799
NNMT	0.990198	1.15013	-0.00874932	2.14907
CST3	0.731873	0.748803	0.666223	2.1469
IFI30	0.757841	0.730098	0.64426	2.1322
FABP5	0.707561	0.755963	0.667379	2.1309
TFF3	0.662554	-0.0712853	1.39547	2.12931
PPT1	0.705145	0.705076	0.718379	2.1286
AIF1	0.740583	0.707337	0.680516	2.12844
NUPR1	0.598491	0.808273	0.717541	2.12431
IER3	0.756474	0.644188	0.72075	2.12141
MT1X	0.692341	0.743352	0.673755	2.10945
ALOX5AP	0.792026	0.72795	0.587923	2.1079
CCL18	0.718417	0.733303	0.650414	2.10213
GBP1	0.729545	0.736916	0.631483	2.09794
TMSB4X	0.71998	0.714584	0.659727	2.09429
FTH1	0.73078	0.683442	0.671171	2.08539
MS4A6A	0.644167	0.670604	0.76578	2.08055
LIPA	0.701472	0.785632	0.586981	2.07408
CTSK	0.425273	0.264619	1.36486	2.05475
TEKT1	0.775171	0.657238	0.609949	2.04236
IL5	1.22822	-0.362571	-0.443625	2.03442
MNDA	0.635863	0.66687	0.719118	2.02185
B2M	0.692423	0.702046	0.62514	2.01961
SH2D6	0.124122	0.737634	1.12675	1.98851
FPR1	0.54527	0.681618	0.761067	1.98796
ANKRD36C	0.557275	0.834521	0.595124	1.98692
FABP3	0.670609	0.68329	0.620587	1.97449
C12orf75	1.07065	0.652647	0.246464	1.96976
ID3	0.731769	0.773574	0.453907	1.95925
HSPA6	-0.0364813	0.175217	-1.73986	1.95156
SPARCL1	0.813369	0.595011	0.540029	1.94841
FTL	0.702088	0.636922	0.606677	1.94569
SOSTDC1	0.00271366	0.849141	-1.08999	1.94184
FGG	1.06923	0.630822	-0.236891	1.93695
GSTA1	0.779991	0.73431	0.422331	1.93663
CCL8	0.624357	0.458305	0.819953	1.90262
GPX3	0.596109	0.626239	0.665532	1.88788
CPVL	0.616148	0.658441	0.611663	1.88625
MUC5B	1.09805	0.694976	0.0694682	1.8625
GPR183	0.130911	0.348068	-1.37617	1.85515
BIRC3	0.479658	0.553636	0.817091	1.85038
LRRC23	0.702338	0.719235	0.426329	1.8479
FCGRT	0.670063	0.716053	0.460413	1.84653
CEACAM5	1.05538	0.62319	-0.164299	1.84287
HBA1	0.584053	-0.0890272	1.15305	1.82613
SCGB3A1	0.62361	0.596007	0.591695	1.81131
NMB	0.648855	0.627075	0.525091	1.80102
SCGB3A2	0.683434	0.549303	0.549013	1.78175
S100B	0.992082	0.159217	-0.599353	1.75065
ORM1	1.03629	0.620796	0.0929963	1.75008
GSTA2	1.12937	0.356671	0.2554	1.74144
ALOX15	0.958663	0.725225	0.0562873	1.74018
PRB1	0.707978	0.662703	0.363717	1.7344
KRT16	0.668193	0.428321	0.637518	1.73403
SCGB1A1	0.610638	0.579762	0.535991	1.72639
C1orf189	0.656923	0.716308	0.346432	1.71966
CD44	0.66764	0.56968	0.462785	1.70011
AQP1	0.573291	0.840749	0.27593	1.68997
MUCL1	0.840724	0.505849	0.332184	1.67876
COL1A2	0.513354	1.12542	-0.00705885	1.64583
FOSB	0.749857	0.598135	-0.297494	1.64549
JUNB	0.684024	0.589943	0.352077	1.62604
VCAM1	0.626487	0.470596	0.527092	1.62417
CAMP	0.608099	0.497878	0.514123	1.6201
CHST9	0.653747	0.655583	0.304534	1.61386
PI3	0.449015	0.582388	0.558276	1.58968
IL1RN	0.826181	0.47783	0.284691	1.5887
KRT6A	0.799895	0.607318	0.181185	1.5884
SLC26A4	0.240627	0.507326	-0.831439	1.57939
AARD	0.664171	0.63554	0.274345	1.57406
SCG2	-0.357424	-0.683398	0.515357	1.55618
CD69	0.867613	0.18724	-0.493945	1.5488
HBA2	0.240919	-0.722974	0.584058	1.54795
KRT23	0.524656	0.412969	-0.568178	1.5058
LIF	0.514023	0.267308	0.711235	1.49257
SOCS2	0.756687	0.673877	0.0604894	1.49105
CPLX2	0.632015	0.444419	0.397232	1.47366
LRRIQ1	0.521332	0.583495	0.343459	1.44829
CTGF	0.796852	0.177482	0.452115	1.42645
CSF3	0.637284	0.702018	-0.0600709	1.39937
FCGR1A	0.522072	0.383809	-0.488166	1.39405
BPIFB2	0.508285	0.500102	0.368617	1.377
JCHAIN	0.453356	0.500909	0.395719	1.34998
ALB	0.105795	-1.05359	-0.186668	1.34605
CBR3	0.29403	0.649282	0.402079	1.34539
LYNX1	0.600193	0.522939	0.163378	1.28651
MT1F	0.655603	0.406433	0.20182	1.26386
CXCL3	0.476328	0.704399	0.0828192	1.26355
GRP	-0.372771	-0.587081	-0.295166	1.25502
SELE	0.19684	-0.551345	0.500236	1.24842
EMCN	0.423509	0.679795	-0.117446	1.22075
PLA2G2D	0.81468	0.146661	0.217786	1.17913
CSF2	-0.621283	0.414111	-0.141435	1.17683
EGR1	0.71013	0.136557	0.323683	1.17037
CCDC146	0.519774	0.552014	0.0839544	1.15574
CRISP3	0.6809	0.470332	-0.00434627	1.15558
LTB	0.0447953	-0.0751271	-1.02924	1.14917
AZGP1	0.65614	-0.00977036	-0.483224	1.14913
STC1	0.354727	0.276628	0.458582	1.08994
MMP11	-0.193128	-0.140547	-0.748971	1.08265
HTRA3	0.336466	0.250706	0.493047	1.08022
MYH11	0.48939	0.489119	0.0917267	1.07024
SPRR3	0.608923	0.160078	0.268862	1.03786
RDH12	0.437129	0.569586	0.022927	1.02964
CA3	0.407559	0.318408	0.299729	1.0257
PAPPA	-0.415674	-0.119276	-0.451192	0.986142
CEL	-0.249345	-0.195772	-0.506733	0.95185
SMR3A	0.457532	0.152814	0.298817	0.909163
CCR7	0.00253705	0.868576	0.0323883	0.903501
PAEP	0.421591	0.286046	0.184193	0.89183
MEG3	0.283038	0.159658	0.438292	0.880988
PCP4	-0.170444	-0.237704	-0.471224	0.879372
GFRA3	0.464928	0.126926	0.248882	0.840736
SPINK1	-0.245932	-0.33724	0.237795	0.820966
CHGB	0.0763962	-0.258972	0.47174	0.807108
CALCA	0.16283	-0.13615	0.479352	0.778333
KRT14	0.280339	0.446665	0.0233583	0.750362
TUBB1	0.241333	0.216989	-0.24574	0.704062
SCGN	-0.0340898	0.0277334	0.620201	0.682025
SLN	-0.109947	0.200637	-0.363647	0.674232
COL22A1	0.566972	0.000902241	0.102982	0.670855
GP2	0.224072	0.370707	0.0552855	0.650064
ACTG2	0.0363384	0.197976	0.391799	0.626113
AKR1C1	-0.133942	-0.281361	0.153593	0.568896
RPRM	-0.0710483	0.217856	0.269076	0.55798
DDC	-0.21354	0.0718166	0.257752	0.543109
ASCL1	0.219279	0.179271	0.140757	0.539307
GHRL	-0.221376	-0.251873	-0.0324885	0.505737
PRSS2	-0.100009	-0.209432	-0.164577	0.474018
CYP2A6	0.0946914	-0.253054	-0.108559	0.456304
RGS4	-0.0499388	0.22103	0.141675	0.412644
COMP	0.216518	0.0565955	-0.132409	0.405522
CD1B	-0.168106	-0.0353949	0.18522	0.388721
CPB1	-0.154889	0.124945	0.074054	0.353887
HIST1H1A	0.147817	0.0789671	0.12489	0.351674
IL32	0.130406	0.0423276	-0.159294	0.332027
PLP1	0.0166556	0.0569005	0.189001	0.262557
MMP10	0.0825167	0.0893917	0.0629911	0.2349
NEFM	0.0243433	0.0118925	-0.194698	0.230934
DIO2	0.0468481	0.0764154	-0.0874184	0.210682
PRAP1	-0.112664	-0.0558037	0.0415758	0.210044
TAC1	-0.133345	-0.00569978	0.0658166	0.204862
MIR7-3HG	0.0981176	0.00152711	0.0146554	0.1143
MMP12	-0.000532251	-0.0501695	-0.0446373	0.095339
ANKRD1	-0.0384555	-0.0261142	0.0220847	0.0866544
ACTC1	-0.00936902	-0.0464776	-0.0184916	0.0743382
PI15	0.0350503	0.0119297	-0.012417	0.059397
CXCL13	0.0304767	0.0153787	0.00503336	0.0508887
IGLL1	0.0171383	-0.0159236	-0.00379488	0.0368567
IGFL1	0.00729525	0.00331421	-0.00537321	0.0159827
S100A7	-0.000434852	-0.0017718	-0.000807284	0.00301394
DEFA4	-9.21428e-05	-0.000182291	-0.00022847	0.000502904
PTPRN	5.33799e-13	1.40827e-20	-8.47503e-36	5.33799e-13
PRB4	5.33799e-13	1.40827e-20	-8.47503e-36	5.33799e-13
OTP	5.33799e-13	1.40827e-20	-8.47503e-36	5.33799e-13
MUC7	5.33799e-13	1.40827e-20	-8.47503e-36	5.33799e-13
FABP7	5.33799e-13	1.40827e-20	-8.47503e-36	5.33799e-13

## Sheet: Supplemental_Table_S7
Supplemental_Table_S7. The weight of each gene in COVID-19 Severe
	GSM4339771	GSM4339773	GSM4339774	Sum of Abs
CD79A	7.58189	7.18798	6.00018	20.7701
UBE2C	5.02649	6.18953	7.00912	18.2251
TOP2A	6.5309	2.67066	6.71617	15.9177
CXCL12	6.42898	5.00884	4.39179	15.8296
CDKN3	5.71304	5.69306	4.27572	15.6818
GZMK	5.43669	5.06882	4.97701	15.4825
NUSAP1	5.21019	5.06726	5.15269	15.4301
TK1	7.44822	4.10185	2.91913	14.4692
VWF	5.67053	4.22229	3.7578	13.6506
RRM2	3.13901	4.39245	4.79766	12.3291
TYMS	-0.37392	5.86429	5.98535	12.2236
C7	3.9675	4.22276	3.69903	11.8893
CENPF	2.53342	3.11499	6.02684	11.6752
CCL22	5.41133	2.86949	2.99223	11.2731
IL13	4.64158	2.82711	3.49347	10.9622
NCCRP1	4.4794	3.40481	2.81324	10.6975
KRT4	4.7558	3.60861	2.2779	10.6423
LY6D	4.29889	3.63457	2.27449	10.208
PLVAP	3.69624	3.46013	3.02887	10.1852
CLEC9A	5.18229	3.35536	1.64489	10.1825
CD207	2.63979	4.04971	3.36423	10.0537
IGFBP3	4.4002	3.4416	2.14001	9.9818
AKAP12	3.56304	3.07833	3.14312	9.78449
CCL17	3.63419	3.42856	2.5418	9.60455
LGALS2	4.50482	1.66464	3.42004	9.5895
CXCL11	3.25069	3.93065	2.33994	9.52127
CXCL9	4.38389	4.40275	0.714617	9.50126
BIRC5	0.0980971	4.73854	4.63924	9.47588
KRT13	3.47029	2.35027	3.63582	9.45638
CCNB2	-2.45681	3.00477	3.95569	9.41727
CD1C	2.33374	3.59039	3.36484	9.28897
SPRY1	3.681	2.5334	2.99105	9.20545
PSCA	3.34939	3.73709	2.02582	9.11231
EDN1	3.84554	2.87975	2.32937	9.05467
KRT5	3.14408	2.80582	2.94004	8.88994
PTTG1	4.82061	2.3446	1.64185	8.80706
UPK1B	3.56958	2.80129	2.25313	8.624
S100A2	2.8993	2.79115	2.85098	8.54143
CPA3	2.86975	2.68785	2.96713	8.52474
CDK1	2.11405	3.9787	2.40871	8.50147
SFRP4	3.52641	1.8893	3.02578	8.44148
CLEC10A	0.152362	5.16564	2.97966	8.29766
IDO1	2.10931	3.57775	2.52053	8.20759
JSRP1	3.65782	2.44746	2.08273	8.18801
CA2	3.5836	2.05015	2.49041	8.12416
TCL1A	3.42246	1.40473	3.22733	8.05453
LYPD2	2.60892	2.97841	2.46126	8.04858
BCL2A1	3.80657	2.10421	2.08651	7.99728
CD1E	0.830244	3.70903	3.44721	7.98648
IL17C	3.12155	2.87276	1.88468	7.87898
HPGD	2.47872	2.60223	2.71718	7.79812
SDS	-3.31905	2.52323	1.78492	7.62719
C15orf48	2.57397	2.95118	2.0992	7.62435
ANGPT2	2.31159	2.64175	2.56896	7.52229
HIGD1B	2.53822	2.50623	2.38708	7.43152
CD24	2.6742	2.49128	2.22576	7.39124
CHIT1	3.757	0.633099	2.99941	7.38951
FSTL3	3.3163	1.77534	2.23516	7.3268
S100P	3.07581	2.48107	1.75537	7.31225
AGER	1.96036	2.71086	2.63204	7.30325
APOBEC3A	3.10634	2.32954	1.84506	7.28094
HIST1H4C	1.93838	2.45201	2.87727	7.26767
ASPN	2.58779	2.45919	2.20282	7.2498
COL1A2	2.33499	2.4696	2.32125	7.12584
PLA2G2A	2.27915	2.82538	2.01889	7.12342
CCL5	2.27237	2.33057	2.5038	7.10674
C1QTNF3	2.64317	2.09	2.34615	7.07932
HMOX1	3.56835	2.24227	1.22058	7.03119
SOD3	1.84046	2.65372	2.53695	7.03113
SCT	2.63579	2.74803	1.51221	6.89602
TFF1	4.09024	0.56539	2.23714	6.89278
FGA	2.71134	2.39652	1.73589	6.84374
C2orf40	2.17675	2.32033	2.32511	6.8222
ITLN1	2.23912	2.26215	2.31414	6.81541
G0S2	2.66218	2.03853	1.9406	6.64132
PLAC9	1.73262	2.77647	2.11598	6.62507
CLDN10	2.88444	2.04095	1.67986	6.60525
AQP5	2.65732	1.7422	2.15051	6.55003
EDNRB	4.71682	0.348973	1.46525	6.53105
MZB1	2.62647	1.91801	1.96108	6.50556
KRT17	2.11686	2.13847	2.20736	6.4627
SOX17	3.43075	1.66255	1.30475	6.39805
ID2	2.13742	2.23465	1.97751	6.34958
KLRB1	2.7481	1.77025	1.7744	6.29275
DERL3	1.68831	2.35994	2.15554	6.20379
KRT23	4.25136	1.70078	0.249032	6.20117
ADAMDEC1	1.43309	4.60717	0.0320171	6.07228
ADH1B	1.0972	2.2882	2.67023	6.05563
OMD	2.57213	1.22079	2.22016	6.01307
IL1B	2.50889	1.75302	1.72604	5.98795
SPP1	0.838682	2.46188	2.67366	5.97423
MGP	1.79004	2.08485	2.09549	5.97039
MKI67	0.650417	0.581368	4.58255	5.81433
VCAN	1.76089	1.69045	2.34164	5.79297
FCN1	2.10222	0.940281	2.72226	5.76476
TSPAN1	1.9934	1.60386	2.12456	5.72181
HMMR	2.50356	0.888942	2.30727	5.69977
CLU	2.00668	1.9199	1.75668	5.68326
HBB	2.29151	0.639321	2.74469	5.67552
IFITM1	2.09541	2.15497	1.42054	5.67093
HP	2.92509	1.30409	1.41139	5.64057
SFN	2.1745	2.45372	1.01103	5.63925
FCGR3A	1.72711	1.85971	2.04328	5.6301
CYP1B1	3.15335	1.28861	1.1757	5.61767
NKG7	1.86347	1.90752	1.81373	5.58471
LGALS7B	2.56602	1.35532	1.6566	5.57794
DNASE1L3	1.70728	1.95896	1.90446	5.57071
DES	2.38157	1.69225	1.48903	5.56285
HERPUD1	2.04837	1.66566	1.78997	5.504
COL6A2	0.930871	2.35882	2.19984	5.48953
SOX4	2.82391	1.36933	1.22385	5.41709
TNFSF10	1.77262	1.94029	1.68692	5.39984
SOD2	3.00691	1.45356	0.934474	5.39494
S100A12	2.23845	1.50856	1.61148	5.35849
FAM107A	1.91525	1.68085	1.75059	5.34668
ITM2C	1.76733	1.75066	1.82541	5.3434
DNAAF1	1.82283	1.05582	2.46462	5.34327
EFEMP1	2.00303	1.68603	1.58439	5.27346
CALY	3.67718	0.0783769	1.50449	5.26005
FCER1A	0.724564	2.90284	1.60904	5.23645
PPBP	1.91775	1.58509	1.72625	5.22909
COX4I2	1.48529	1.80647	1.93036	5.22212
SOSTDC1	2.23074	1.04942	1.91006	5.19022
PI16	3.36598	1.03699	0.782765	5.18574
SPRR2A	0.851047	3.35385	0.971763	5.17666
RERGL	2.05356	1.70545	1.41019	5.1692
CTSG	1.41642	2.12476	1.5749	5.11608
PPP1R14A	1.17016	2.10429	1.83223	5.10669
CCL19	-0.794367	1.91903	2.38832	5.10171
CCR7	1.65367	1.02614	2.40644	5.08624
CXCL8	3.1268	1.44138	0.487258	5.05543
CLEC3B	1.89361	1.58778	1.55656	5.03795
MUC20	1.78537	1.57155	1.66512	5.02205
KRT15	1.15239	2.46999	1.39804	5.02041
ACKR1	1.68092	1.68249	1.62628	4.98968
TIMP1	1.63091	2.2632	1.08483	4.97894
LUM	0.954901	2.06614	1.9385	4.95954
SFRP2	2.12753	1.12444	1.70656	4.95853
IGFBP6	2.55375	0.843398	1.53503	4.93218
ADH7	1.95664	0.98303	1.98236	4.92203
FAM229B	1.36225	1.84308	1.71559	4.92092
RGS1	1.94498	1.39273	1.56797	4.90568
C1S	1.17205	1.48315	2.21169	4.86688
FAM216B	1.83446	1.59941	1.3931	4.82698
GPC3	1.638	1.65254	1.52515	4.81569
AKR1C3	1.77468	1.55188	1.4677	4.79425
CCDC78	1.52897	1.82751	1.41207	4.76854
SLC35D3	3.09974	0.988021	0.666799	4.75456
EFCAB1	1.67755	1.39465	1.65677	4.72896
FGFBP1	1.66151	2.30067	0.74792	4.71011
PCOLCE	2.20536	1.07875	1.42022	4.70432
AQP3	2.16099	1.27456	1.24797	4.68352
PLAUR	2.22135	1.59385	0.861865	4.67706
TAGLN	1.72867	1.5596	1.3784	4.66666
GPR183	1.10393	3.08849	0.439633	4.63206
RHCG	1.83986	2.27764	0.505949	4.62345
CCNO	1.63363	1.80168	1.18548	4.62079
STMN1	2.65792	0.90607	1.04605	4.61004
TRH	2.91072	1.67032	0.0262237	4.60727
GNLY	1.14262	1.64494	1.7916	4.57916
IGFBP7	1.38221	1.61908	1.54094	4.54223
ADIRF	1.31218	1.85332	1.35002	4.51552
PRSS23	0.28573	1.78393	2.40116	4.47081
EPAS1	1.48173	1.47325	1.51455	4.46954
GADD45B	1.6628	1.4418	1.34221	4.44681
IL1R2	0.141291	2.62895	1.64044	4.41069
IL1RL1	1.58433	1.20166	1.61298	4.39898
SERPINB2	-2.0671	-1.98785	-0.340295	4.39524
HAS1	0.492596	1.16732	2.68621	4.34613
CLDN4	2.22044	1.09934	1.02539	4.34517
FCN3	1.22957	1.53425	1.57619	4.34001
CD14	0.982752	1.33748	1.98738	4.30761
CDHR3	1.40756	1.48399	1.40974	4.30129
CCDC170	1.55987	1.45056	1.27242	4.28284
MT1H	0.825437	1.52564	1.92733	4.27841
EGFL7	1.48983	1.41261	1.37209	4.27452
PIFO	1.68862	1.16826	1.40914	4.26602
S100B	-0.764518	2.40791	1.09227	4.2647
MFAP4	0.78781	1.76811	1.70116	4.25708
CLCA2	1.83445	1.18078	1.2074	4.22263
CLEC14A	1.29044	1.55975	1.37189	4.22208
SERPINB11	1.35014	1.39501	1.47131	4.21646
CA4	1.40672	1.35163	1.4562	4.21455
TPM2	1.21448	1.6049	1.38781	4.2072
CFB	1.96406	1.35644	0.878159	4.19865
TUBB4B	1.25134	1.4876	1.44975	4.18869
EMP1	1.4683	1.27066	1.44827	4.18723
TUBB	1.22341	1.55742	1.40524	4.18607
ADH1C	1.23868	1.26992	1.67524	4.18384
PIGR	1.67286	1.37985	1.11364	4.16635
ANGPTL4	1.64431	0.999168	1.51652	4.16
MSR1	1.50207	1.39489	1.25886	4.15582
GDF15	2.15369	1.4742	-0.522733	4.15063
IFITM3	1.09477	1.56865	1.48619	4.14961
FOS	1.78267	1.00204	1.34813	4.13284
HMGB2	2.05254	0.987237	1.08746	4.12723
MFAP5	1.21873	1.04703	1.85873	4.12449
ROPN1L	1.2632	1.33347	1.51574	4.1124
PTX3	1.24274	1.51626	1.33892	4.09792
MS4A2	1.11673	1.35317	1.62663	4.09653
C3	1.86145	0.836845	1.39044	4.08873
ICAM1	1.52531	1.04837	1.50725	4.08094
C1orf194	1.24004	1.47096	1.35779	4.06879
TNFAIP6	0.923993	1.66298	1.47087	4.05785
RARRES2	1.04062	1.52767	1.48739	4.05569
FAM92B	1.46591	1.30159	1.28257	4.05007
MUC4	1.7989	1.20614	1.03921	4.04425
PLN	1.94346	0.899575	1.19626	4.0393
TSC22D1	1.47303	1.31636	1.2475	4.0369
PRF1	1.32336	1.37408	1.33649	4.03393
IL22	-2.88418	-0.941618	-0.198437	4.02424
LTF	1.68063	1.25651	1.07324	4.01039
LRRC46	0.950176	1.7539	1.27246	3.97654
CD55	1.66545	1.21546	1.06796	3.94887
FAM3D	1.41617	0.866428	1.66196	3.94456
MYL9	1.30048	1.31542	1.32241	3.9383
CHI3L1	-2.775	-1.07779	0.0762218	3.92901
TMEM190	1.17298	1.31735	1.4328	3.92313
HYAL2	1.25195	1.26378	1.40293	3.91866
DYNLRB2	1.20631	1.28968	1.40467	3.90065
CTXN1	1.40512	1.16296	1.32151	3.8896
CD27	1.2305	0.80824	1.83479	3.87353
CXCL2	1.37091	1.36408	1.11336	3.84835
TACSTD2	1.60268	1.1982	1.04054	3.84141
XCL2	0.991827	1.53859	1.30867	3.83908
FBLN1	1.16526	1.283	1.39018	3.83843
IER2	1.33807	1.2423	1.24326	3.82363
CXCL5	1.69488	1.11466	1.01073	3.82027
SERPINA3	1.74797	1.32498	0.73839	3.81135
ID1	1.39378	1.11432	1.30088	3.80897
FAM183A	1.16526	1.29437	1.34018	3.79981
FXYD3	1.24094	1.20106	1.34842	3.79042
LRRC23	1.3372	1.27355	1.17907	3.78981
PRR4	1.29904	1.19576	1.28813	3.78293
DCN	0.859094	1.50158	1.41759	3.77826
ADAMTS1	0.915505	1.46679	1.39393	3.77622
FDCSP	0.628671	1.07981	2.06445	3.77294
CCDC80	0.687703	0.821634	2.26166	3.77099
CX3CL1	1.39444	1.04947	1.31635	3.76026
C9orf116	1.03876	1.29027	1.41626	3.74529
CES1	1.48075	1.09644	1.1559	3.73309
CFAP53	1.52492	1.06416	1.14265	3.73173
TFF3	2.11084	1.11061	0.507831	3.72928
NEFL	-1.09483	-1.76824	-0.861487	3.72456
CCL2	0.856841	1.23521	1.62333	3.71538
S100A3	2.7138	0.194266	0.789835	3.6979
C11orf97	1.01812	1.32315	1.35528	3.69655
CH25H	1.53465	1.01131	1.12164	3.66759
TNFRSF17	1.09436	1.39237	1.17648	3.66321
HMGN2	0.813987	1.54637	1.29792	3.65828
KLK12	1.05303	0.743007	1.86224	3.65828
MUC5AC	1.24768	0.746663	1.66087	3.65522
TCTEX1D2	1.24143	0.563876	1.84206	3.64737
FCGBP	1.55354	1.24638	0.845175	3.64509
HMGB1	1.36432	1.29499	0.960471	3.61978
ATP13A4-AS1	1.74694	1.02142	0.842787	3.61114
ERICH3	1.14203	1.15084	1.3014	3.59427
CKB	1.21533	1.28055	1.0936	3.58948
SST	1.93953	0.12225	1.52579	3.58757
C11orf88	1.09842	1.31247	1.1739	3.5848
CCL21	1.24857	1.18571	1.14563	3.57991
CALD1	0.753925	1.34166	1.4661	3.56168
C9orf24	1.158	1.12501	1.26568	3.5487
CAV1	1.20177	1.21849	1.12692	3.54718
CXCL16	1.27972	1.19006	1.07201	3.54179
DIRAS3	2.30225	0.628321	0.605811	3.53638
SMIM22	1.16118	1.04879	1.29498	3.50495
CCL23	1.49886	0.957866	1.04605	3.50278
CRABP2	1.16659	1.14066	1.18442	3.49167
ALDH1A3	1.04382	0.739041	1.70857	3.49143
ODF3B	1.11961	1.14699	1.21858	3.48518
DEFB1	0.96018	1.23592	1.28897	3.48507
SPAG6	1.18728	1.15597	1.13782	3.48106
WDR38	1.14902	1.08494	1.24652	3.48048
AGR2	1.14473	1.03557	1.29286	3.47316
DNAH12	1.2938	1.0341	1.13639	3.46429
RHOB	1.23073	1.18448	1.04232	3.45753
NNMT	0.684816	1.087	1.67057	3.44239
TM4SF1	1.29826	1.07132	1.05515	3.42474
C20orf85	1.11072	1.09637	1.21614	3.42323
CCL20	1.52901	0.93623	0.957316	3.42256
SLC9A3R2	1.29456	1.12701	0.985417	3.40699
C4BPA	1.10267	1.2066	1.09426	3.40352
SFTA1P	1.10922	1.40204	0.891271	3.40253
SPRR2D	1.72612	0.437058	1.23461	3.3978
FCER1G	1.26999	1.1108	1.01549	3.39627
IL5	1.47642	0.546594	1.37162	3.39463
STEAP4	0.513242	1.30551	1.57466	3.39341
XCL1	1.05672	1.40274	0.93278	3.39224
CSTA	1.27114	1.10806	1.01264	3.39185
TFRC	1.17131	1.21777	1.002	3.39108
COL3A1	-0.154161	1.21398	2.01918	3.38733
MORN2	0.964458	1.24786	1.17206	3.38438
MS4A8	1.13615	1.07635	1.16673	3.37923
HMGB3	0.719214	1.39689	1.25148	3.36758
TSPAN8	0.910597	1.05708	1.3967	3.36438
PLAC8	1.18405	1.19438	0.981921	3.36035
RETN	1.29204	0.995625	1.07222	3.35988
PILRA	1.23333	0.999323	1.12243	3.35508
TMEM100	0.996952	1.11718	1.23691	3.35104
S100A9	0.924416	1.22904	1.1939	3.34736
RTKN2	1.19867	1.10968	1.03864	3.34699
CD163	1.29324	1.02961	1.02075	3.3436
TMC5	1.21909	1.03146	1.08389	3.33444
SLC44A4	1.14695	1.05623	1.11859	3.32177
CCL11	0.617151	1.48434	1.22006	3.32156
EMP2	1.07157	1.2707	0.961298	3.30357
HSP90B1	1.37497	1.0338	0.893699	3.30247
ATP6V1G3	-0.378169	2.27661	0.647422	3.3022
C19orf33	0.902772	1.06767	1.33092	3.30137
LDLRAD1	0.951126	1.1539	1.18564	3.29066
CEACAM6	1.05875	1.16132	1.06166	3.28173
RNASE1	1.11791	1.10822	1.05477	3.2809
INHBA	0.946486	1.3855	0.944504	3.27649
FABP6	1.00922	0.947554	1.31917	3.27594
C5orf49	0.924846	1.16717	1.18175	3.27376
EZR	1.45567	0.827537	0.990459	3.27367
DEFB4A	1.37675	0.524027	1.37229	3.27307
CEBPB	1.24474	1.01002	1.01647	3.27122
CFAP126	0.967798	1.05842	1.2298	3.25601
TMEM45A	0.905328	1.10598	1.23438	3.24568
KRT8	0.962112	1.33765	0.928121	3.22788
TSPAN19	1.0099	0.98075	1.22829	3.21893
SOCS3	0.664401	1.29756	1.25289	3.21485
HSPA6	-2.5704	-0.525479	-0.118849	3.21473
SAA1	1.04091	1.08067	1.08297	3.20455
CCDC17	1.01724	0.993436	1.19347	3.20414
KCNE4	1.73923	0.713522	0.749678	3.20243
APOE	1.06213	1.12972	1.00463	3.19648
ASCL3	-1.58732	-1.44151	0.167629	3.19647
SPI1	1.12941	1.03107	1.03251	3.19299
NAMPT	0.86865	1.34503	0.976234	3.18991
MT1G	1.00652	0.989586	1.19351	3.18962
ADM	-2.30849	0.467782	0.399252	3.17552
KRT19	0.931579	1.00053	1.24284	3.17494
CD52	1.30934	1.02769	0.835655	3.17268
RGS2	1.36893	0.777195	1.01972	3.16584
LCN2	1.12396	1.0459	0.987598	3.15746
PRB3	0.689573	1.36317	1.10199	3.15473
ZMYND10	0.934766	1.01146	1.203	3.14922
TPSB2	0.946707	1.07125	1.10813	3.12609
MSMB	1.04925	1.09797	0.976495	3.12371
CLDN3	1.25027	0.85687	1.01461	3.12175
AGR3	1.24881	0.9514	0.917991	3.1182
RSPH1	0.890236	1.00539	1.22229	3.11792
MORN5	0.866666	1.10651	1.14004	3.11321
WFDC12	1.05447	1.03353	1.02439	3.1124
FOXI1	0.0524349	2.70695	0.349771	3.10916
TKT	1.3431	0.965751	0.794036	3.10288
SLC6A14	1.10625	1.02085	0.953571	3.08067
PLIN2	1.18398	0.964894	0.922873	3.07175
S100A8	1.13337	0.985156	0.946799	3.06533
HSP90AB1	1.26612	0.954143	0.838278	3.05854
HOPX	0.921007	1.31197	0.816089	3.04906
ALOX15	1.34942	0.743261	0.944484	3.03716
CD59	1.08058	1.03762	0.914769	3.03296
C1R	0.913052	1.07217	1.04677	3.03199
S100A14	1.04456	0.886215	1.09977	3.03054
SAA2	1.04531	0.977137	1.00599	3.02844
PRSS21	1.09269	0.926188	1.00913	3.02801
KRT7	1.11258	1.00719	0.901632	3.02141
BCAM	1.01613	0.924296	1.07568	3.01611
RRAD	1.10888	1.00545	0.895918	3.01026
TTR	-1.63182	-0.645525	-0.732116	3.00947
CD9	1.06229	1.01473	0.930126	3.00714
KRT18	0.94093	1.14076	0.921973	3.00366
S100A1	1.74615	0.956212	0.292398	2.99476
BIRC3	-0.00669435	1.36938	1.6171	2.99318
NTM	1.58699	0.634837	0.759844	2.98168
SERPINF1	0.782338	0.879323	1.31467	2.97633
SAT1	1.20408	0.885819	0.885751	2.97565
F3	1.45596	0.878716	0.639404	2.97408
RGS16	1.01615	0.897765	1.05071	2.96463
KLK11	0.267966	1.15194	1.53765	2.95756
DKK1	1.77984	0.519541	-0.651117	2.95049
RSPH9	0.653645	0.976687	1.3163	2.94664
CNN1	1.14361	1.24753	0.553763	2.94491
BPIFA1	0.999546	0.987499	0.957811	2.94486
HLA-E	0.974564	1.00153	0.967331	2.94343
TIMP3	0.918589	0.998817	1.01524	2.93265
CTSL	0.946286	1.27367	0.690415	2.91037
AREG	1.30618	0.922807	0.678047	2.90703
IGLL5	0.791269	1.10409	1.00517	2.90052
FKBP11	1.22249	0.882242	0.795006	2.89974
CYP4B1	0.986952	1.02476	0.880008	2.89172
PF4	0.760759	1.16574	0.961367	2.88787
CYP24A1	0.295405	-0.114941	2.47667	2.88701
PCSK1N	1.36297	0.166556	1.35515	2.88468
MDK	1.05078	0.889122	0.93949	2.8794
COL1A1	-0.619188	1.24001	1.0176	2.8768
CYP26A1	0.428195	1.92965	0.507491	2.86533
XAGE2	1.1147	0.913956	0.83216	2.86082
FDX1	1.1521	0.86958	0.830441	2.85212
PDLIM1	1.08241	0.932022	0.836958	2.85139
HLA-DQB2	1.06647	0.891891	0.892772	2.85113
IL7R	1.21176	0.82653	0.812571	2.85086
MGST3	1.02733	0.949603	0.873494	2.85043
CAPSL	0.76491	0.824879	1.25979	2.84958
H2AFZ	1.21463	0.802875	0.828442	2.84595
C6orf58	0.955719	0.97027	0.917679	2.84367
LPL	0.948791	0.915029	0.974425	2.83825
CCNB1	1.28505	1.08069	0.470254	2.836
OLR1	0.875185	0.916822	1.03241	2.82442
TSC22D3	1.02983	0.930023	0.862594	2.82245
NEAT1	0.950072	0.961392	0.908058	2.81952
ITM2B	1.0441	0.924302	0.849236	2.81764
ELF3	0.933334	0.913577	0.969785	2.8167
PCOLCE2	0.891495	0.935646	0.988559	2.8157
BSG	0.877777	1.01403	0.919261	2.81107
SFTPB	0.968943	0.914405	0.925117	2.80846
GSTP1	0.930261	0.923983	0.953313	2.80756
SCD	1.03673	0.925276	0.840199	2.8022
S100A4	1.07613	0.878895	0.84624	2.80127
ADAMTS4	1.08962	0.84842	0.856381	2.79442
XBP1	1.05294	0.880116	0.861168	2.79422
PIP	0.994925	1.06328	0.729576	2.78778
IGFBP5	-1.16825	-0.431064	1.17752	2.77684
LILRB4	1.11985	0.967576	0.68494	2.77236
CPE	0.867868	0.909469	0.986157	2.76349
GNG11	1.02023	0.846433	0.895843	2.7625
LGALS3BP	1.05259	0.880413	0.815343	2.74834
SH2D6	0.00435285	2.67925	0.056788	2.7404
DYNLL1	1.01171	0.893493	0.834531	2.73973
MGST1	0.853471	0.925933	0.959539	2.73894
MALL	0.842943	0.968977	0.92686	2.73878
KYNU	0.892414	0.920103	0.924713	2.73723
DMBT1	0.996499	0.86664	0.872495	2.73563
MEDAG	0.350017	0.408129	1.97582	2.73397
A2M	0.568288	1.06469	1.08643	2.71941
FOLR1	0.895424	0.945357	0.877527	2.71831
ACTA2	0.738894	0.91361	1.06478	2.71728
KLF5	0.868437	0.857496	0.989978	2.71591
CA1	0.856606	0.947119	0.91176	2.71549
VSIG4	0.948048	0.891384	0.870809	2.71024
MMP7	-0.0622976	1.54842	-1.09843	2.70915
HLA-DQB1	0.963914	0.908319	0.832867	2.7051
TMEM176B	0.724645	1.02542	0.952659	2.70273
CEACAM5	0.711969	0.855515	1.13453	2.70201
IFI27	0.998507	0.884748	0.81608	2.69934
CYBB	1.03664	0.860975	0.801711	2.69932
SLC25A6	0.952884	0.884008	0.86056	2.69745
MMP9	-1.10394	0.801093	0.792103	2.69713
MS4A7	0.942112	0.867116	0.884045	2.69327
SLC7A7	1.01191	0.855659	0.825642	2.69321
CD37	0.973985	0.884348	0.834593	2.69293
MS4A4A	0.997458	0.86426	0.828169	2.68989
TUBA1A	0.918282	0.921337	0.849448	2.68907
LSP1	1.10096	0.790187	0.797345	2.68849
ANXA1	0.951755	0.88543	0.850341	2.68753
SERPINA1	0.97869	0.858009	0.850017	2.68672
C16orf89	0.877575	0.893995	0.912927	2.6845
PTGDS	1.28367	1.3301	0.0703822	2.68415
UBD	0.842097	1.07595	0.764602	2.68265
C9orf135	0.827859	0.719139	1.13481	2.6818
SCPEP1	0.941057	0.885895	0.853147	2.6801
NOP10	0.970506	0.873272	0.832456	2.67623
MCEMP1	0.885661	0.886043	0.904248	2.67595
MRC1	1.07364	0.681771	0.918196	2.67361
RPS27L	0.95569	0.866998	0.847707	2.6704
LYZ	0.847488	0.91692	0.903319	2.66773
TXN	0.987293	0.88678	0.790604	2.66468
DSTN	0.90325	0.913804	0.84622	2.66327
CTSH	0.854434	0.913874	0.89182	2.66013
SELENBP1	0.876614	0.921876	0.859787	2.65828
PDZK1IP1	0.79267	1.00452	0.85933	2.65652
NAPSA	0.88707	0.863822	0.904593	2.65549
TREM2	1.01004	0.825749	0.816618	2.65241
VMO1	0.868228	0.864007	0.91886	2.6511
CXCL17	0.843609	0.850326	0.955739	2.64967
POSTN	0.0723943	1.29878	1.27473	2.6459
LRRFIP1	0.918693	0.880986	0.845391	2.64507
EMP3	0.960825	0.838168	0.843422	2.64242
GMFG	0.956043	0.854852	0.830999	2.64189
DBI	0.894014	0.893266	0.852675	2.63996
NPC2	0.867308	0.894425	0.878011	2.63974
ASAH1	0.946906	0.850799	0.837235	2.63494
S100A6	0.935681	0.868519	0.826197	2.6304
ALOX5	0.902044	0.869278	0.856104	2.62743
FPR1	0.629089	1.01212	0.985543	2.62675
RTN4	0.910422	0.878365	0.836204	2.62499
STXBP2	0.875559	0.888239	0.856448	2.62025
UBC	0.929024	0.870533	0.820088	2.61964
FABP4	0.906125	0.886447	0.826534	2.61911
RPL10A	0.878441	0.878671	0.857758	2.61487
SDC4	0.871904	0.91092	0.831375	2.6142
RPLP0	0.915567	0.869088	0.828382	2.61304
GZMB	0.879822	0.855903	0.876431	2.61216
POMP	0.922965	0.856591	0.826519	2.60608
S100A10	0.950674	0.83926	0.81604	2.60597
SLC25A5	0.880138	0.896745	0.827541	2.60442
C1orf162	0.941241	0.833987	0.828796	2.60402
RPL7	0.915029	0.858269	0.830443	2.60374
CLDN7	0.881495	0.874544	0.845889	2.60193
GCHFR	0.843684	0.900369	0.857634	2.60169
ALDH1A1	0.922476	0.852127	0.825161	2.59976
LDHB	0.927023	0.878577	0.793752	2.59935
RPS2	0.881447	0.868009	0.848602	2.59806
PPIA	0.92353	0.85121	0.823212	2.59795
RPS6	0.897515	0.863437	0.832932	2.59388
TYROBP	0.933933	0.825219	0.834279	2.59343
HS3ST1	0.976645	0.796431	0.819418	2.59249
BPIFB1	0.912029	0.867176	0.812033	2.59124
PEBP4	0.847221	0.906389	0.837021	2.59063
SFTPD	0.86265	0.855399	0.871877	2.58993
CD68	0.905463	0.839801	0.84447	2.58974
GLUL	1.00474	0.779755	0.802257	2.58676
MYOC	0.432818	1.22265	0.930646	2.58611
RPS26	0.964341	0.792858	0.8289	2.5861
NPM1	0.896349	0.855572	0.832342	2.58426
RPL13	0.867601	0.868349	0.846608	2.58256
COTL1	1.04358	0.768907	0.769799	2.58228
IL32	2.0141	0.40951	0.158237	2.58185
COX4I1	0.89758	0.851394	0.831656	2.58063
RPS12	0.881131	0.85002	0.846644	2.57779
GSN	0.868945	0.862407	0.844383	2.57573
LAPTM5	0.837233	0.901844	0.836194	2.57527
SEC11C	0.858234	0.866437	0.849229	2.5739
RPL18	0.871596	0.861872	0.839023	2.57249
SFTA3	0.807138	0.898524	0.863707	2.56937
CEBPD	0.790706	0.884492	0.893235	2.56843
RPL14	0.872296	0.856028	0.838939	2.56726
RAMP2	0.679364	0.912192	0.975484	2.56704
RPS18	0.861473	0.863628	0.841598	2.5667
GAPDH	0.937876	0.841962	0.786811	2.56665
RPS14	0.882252	0.850853	0.832693	2.5658
PRDX5	0.851357	0.863487	0.845866	2.56071
RPL34	0.905386	0.83401	0.820636	2.56003
RPS8	0.871399	0.851265	0.83548	2.55814
ACP5	0.861914	0.894712	0.800763	2.55739
RPL22	0.872011	0.849248	0.835956	2.55721
CP	0.663605	1.07919	0.813176	2.55597
ARPC2	0.905718	0.833049	0.817128	2.5559
TMEM59	0.85447	0.859876	0.840659	2.55501
CAPS	0.648898	0.741608	1.164	2.55451
RPS15A	0.868592	0.855397	0.830144	2.55413
CLIC1	0.893433	0.846882	0.811357	2.55167
ARPC5	0.920668	0.825852	0.805136	2.55166
SNX10	0.776242	0.880153	0.895089	2.55148
TMBIM6	0.881238	0.844576	0.825561	2.55138
RGCC	0.980333	0.753372	0.817578	2.55128
MARCO	0.884223	0.850366	0.816295	2.55088
NFKBIA	0.895861	0.827372	0.825174	2.54841
UBB	0.894783	0.831974	0.82117	2.54793
RPS27	0.89506	0.825122	0.827109	2.54729
RPL32	0.863306	0.851507	0.830547	2.54536
SFTPA1	0.861079	0.82336	0.859795	2.54423
PSME2	0.917433	0.828594	0.797943	2.54397
TMSB10	0.951174	0.797771	0.793084	2.54203
CHI3L2	0.841693	0.823002	0.876945	2.54164
ALDH2	0.884681	0.845563	0.811225	2.54147
TUBA1B	0.917645	0.806245	0.81743	2.54132
HLA-DPB1	0.869612	0.845116	0.825403	2.54013
CTSD	0.87844	0.858753	0.802648	2.53984
S100A11	0.883716	0.85325	0.802339	2.53931
WIF1	0.833925	0.774585	0.929844	2.53835
CA3	0.660816	1.41073	0.466757	2.5383
ARPC3	0.915698	0.823833	0.798666	2.5382
SSR4	0.821117	0.86089	0.855224	2.53723
PGC	0.831444	0.82906	0.876702	2.53721
APOC1	0.851608	0.86302	0.822395	2.53702
CXCL10	0.512533	1.13283	0.891319	2.53668
RPL24	0.876122	0.839108	0.820289	2.53552
CYP27A1	0.819629	0.849624	0.866142	2.53539
COX7C	0.853947	0.841674	0.838287	2.53391
PRR13	0.854951	0.845879	0.831142	2.53197
HSP90AA1	0.87909	0.826185	0.826582	2.53186
RPL35A	0.860784	0.8438	0.827046	2.53163
DECR1	0.895631	0.818094	0.815963	2.52969
C1QA	0.909722	0.833885	0.783284	2.52689
SERPING1	0.806947	0.875144	0.844097	2.52619
CYB5A	0.846039	0.855041	0.824074	2.52515
EEF1G	0.825217	0.86338	0.836287	2.52488
RPS3	0.815829	0.86519	0.842865	2.52388
HMGN3	0.827132	0.867258	0.829172	2.52356
RPL12	0.847228	0.844889	0.831254	2.52337
HCK	0.819158	0.840934	0.861695	2.52179
MT2A	0.873263	0.854528	0.792679	2.52047
HSPA8	0.720316	0.900263	0.899744	2.52032
LAMP1	0.865772	0.825542	0.827246	2.51856
TPSAB1	0.613394	0.969552	0.935608	2.51855
ATP6V1F	0.885095	0.820451	0.812466	2.51801
RBP4	0.846042	0.88842	0.783522	2.51799
CAPG	0.832943	0.866208	0.818403	2.51755
RPL30	0.850715	0.842776	0.822305	2.5158
LAMTOR1	0.851419	0.830817	0.833211	2.51545
RPS29	0.846375	0.832402	0.83428	2.51306
ATP1B1	0.808426	0.849067	0.855549	2.51304
RPS23	0.861921	0.833978	0.816933	2.51283
RPL5	0.810745	0.866693	0.831775	2.50921
RPS7	0.815403	0.858161	0.834654	2.50822
HLA-DMA	0.846935	0.841767	0.819454	2.50816
RPS9	0.827268	0.850434	0.830255	2.50796
SFTA2	0.802341	0.870244	0.835178	2.50776
DNAH5	0.543729	0.752951	1.21081	2.50749
ARPC1B	0.873201	0.827985	0.805722	2.50691
RPL23A	0.844059	0.836682	0.825671	2.50641
RPL8	0.833575	0.842328	0.829545	2.50545
FOXJ1	0.618828	0.803259	1.08261	2.5047
RPL17	0.858201	0.825726	0.820628	2.50456
LPO	0.851246	0.785203	0.867668	2.50412
RPS5	0.83619	0.844222	0.823531	2.50394
RPL38	0.854507	0.825	0.823991	2.5035
MUC1	1.28323	0.639058	0.580948	2.50324
RPL3	0.802497	0.866055	0.834375	2.50293
TAGLN2	0.866255	0.824712	0.811179	2.50215
RPS4X	0.819176	0.848735	0.832849	2.50076
ZFP36	0.81327	0.872494	0.814488	2.50025
RPL19	0.834746	0.837823	0.826479	2.49905
C9orf16	0.862192	0.824754	0.811529	2.49848
MYL12B	0.840707	0.842104	0.815359	2.49817
JUN	0.787968	0.87958	0.828777	2.49633
IGFBP2	0.888133	0.781653	0.825337	2.49512
RPL11	0.833905	0.8335	0.826808	2.49421
RPL10	0.825006	0.848411	0.820638	2.49405
HLA-DPA1	0.854914	0.840504	0.797691	2.49311
UQCRB	0.829757	0.83908	0.823704	2.49254
SH3BGRL	0.867983	0.820035	0.803617	2.49163
LGALS1	0.879168	0.820433	0.791422	2.49102
LDHA	0.855301	0.8423	0.793271	2.49087
CALM2	0.829658	0.842211	0.816429	2.4883
VIM	0.856446	0.822602	0.808508	2.48756
NACA	0.829267	0.835305	0.820614	2.48519
RPL9	0.825317	0.840113	0.819553	2.48498
HLA-DMB	0.839876	0.81831	0.82659	2.48478
CD53	0.871616	0.799487	0.812477	2.48358
PPDPF	0.840819	0.829056	0.811689	2.48156
PTMA	0.80793	0.845521	0.827677	2.48113
CAP1	0.904125	0.800326	0.776563	2.48101
CTSB	0.899568	0.816617	0.76322	2.4794
RPS25	0.830756	0.828854	0.819694	2.4793
AK1	0.781349	0.853041	0.844347	2.47874
RPS27A	0.822042	0.837319	0.818101	2.47746
RPL7A	0.824142	0.832966	0.816843	2.47395
RPL27A	0.8095	0.839613	0.82466	2.47377
WFDC2	0.783121	0.856797	0.833674	2.47359
APLP2	0.841046	0.819001	0.813294	2.47334
UTS2	0.635147	1.09665	0.739478	2.47128
COMT	0.863008	0.798881	0.809019	2.47091
CD74	0.846013	0.815305	0.809459	2.47078
ATP6V0E1	0.850626	0.815577	0.803115	2.46932
RPS3A	0.820702	0.821584	0.823922	2.46621
TCN1	0.770621	0.890944	0.803285	2.46485
CTSC	0.847808	0.824731	0.791957	2.4645
LGALS3	0.893123	0.817433	0.753173	2.46373
RPS28	0.835094	0.812221	0.816413	2.46373
ACTB	0.86303	0.80714	0.791258	2.46143
RPL36AL	0.821886	0.829166	0.80952	2.46057
RPS15	0.816905	0.827332	0.815677	2.45991
RPL4	0.817986	0.828607	0.81292	2.45951
RPL21	0.841351	0.81163	0.806437	2.45942
KLK10	0.648246	0.984514	0.826473	2.45923
ALDH3A1	0.712556	0.671814	1.07465	2.45902
RPS19	0.847273	0.802266	0.809315	2.45885
HNRNPA1	0.757703	0.864258	0.836559	2.45852
EEF1B2	0.790394	0.844469	0.823235	2.4581
PEBP1	0.826681	0.827247	0.804088	2.45802
SLPI	0.763989	0.869803	0.823605	2.4574
MYL12A	0.848265	0.806092	0.801442	2.4558
CITED2	0.743206	0.827645	0.883953	2.4548
EIF1	0.815899	0.82684	0.8108	2.45354
RPL18A	0.815461	0.826332	0.811551	2.45334
PLD3	0.842443	0.803678	0.806444	2.45257
RMDN3	0.851797	0.785167	0.815297	2.45226
RPL31	0.809101	0.824316	0.818652	2.45207
RPL27	0.812906	0.817896	0.820802	2.4516
COX5B	0.821939	0.83483	0.794533	2.4513
BTF3	0.814935	0.843923	0.791088	2.44995
H3F3B	0.801909	0.832277	0.815726	2.44991
TFPI2	0.691076	1.07258	0.685544	2.4492
RND1	0.825994	0.829678	0.793312	2.44898
PERP	1.00349	0.620956	0.824437	2.44888
CTSZ	0.869578	0.797413	0.781861	2.44885
TREM1	0.784215	0.855887	0.80766	2.44776
PLBD1	0.896327	0.770392	0.780165	2.44688
C1QB	0.88701	0.810121	0.749027	2.44616
CDC42	0.817914	0.824391	0.803722	2.44603
SNX2	0.81689	0.812917	0.81523	2.44504
COX6C	0.835911	0.812755	0.79592	2.44459
HEXA	0.851679	0.799357	0.792979	2.44401
DUSP1	0.813659	0.81711	0.813226	2.44399
TXNIP	0.824899	0.799982	0.818628	2.44351
NUPR1	0.811347	0.852747	0.778983	2.44308
MT1E	0.769779	0.834703	0.838107	2.44259
RPL15	0.799309	0.822858	0.818596	2.44076
LRPAP1	0.857398	0.789298	0.79382	2.44052
RPL29	0.793685	0.833038	0.813756	2.44048
RPL36	0.829076	0.810291	0.798921	2.43829
GEM	0.758994	0.743899	0.935258	2.43815
FN1	0.880031	0.801735	0.755883	2.43765
ATP6V0C	0.826061	0.800477	0.810825	2.43736
CXCL14	0.946455	0.660218	0.828684	2.43536
RPS24	0.782388	0.833164	0.819684	2.43524
NDUFA4	0.815763	0.815865	0.803571	2.4352
FABP5	0.834117	0.86763	0.733052	2.4348
ARL6IP1	0.74473	0.820019	0.868194	2.43294
CD63	0.829665	0.805684	0.797474	2.43282
SH3BGRL3	0.828099	0.806798	0.797865	2.43276
KRT16	0.961183	0.379418	1.09205	2.43265
RPL35	0.795394	0.81688	0.819626	2.4319
C1QC	0.877825	0.820926	0.732913	2.43166
RPL26	0.788433	0.832139	0.811032	2.4316
CLC	-1.68434	-0.207203	-0.539086	2.43063
RPLP1	0.78079	0.829814	0.819848	2.43045
ATP6V0D1	0.819074	0.822819	0.788428	2.43032
REEP5	0.81295	0.817077	0.800091	2.43012
HLA-DQA2	0.794376	0.820246	0.815425	2.43005
MIF	0.771597	0.835172	0.823233	2.43
RPL6	0.791203	0.830138	0.807349	2.42869
RPL13A	0.769272	0.843357	0.815907	2.42854
RPL39	0.816088	0.81178	0.800653	2.42852
ACTG1	0.820458	0.816517	0.789524	2.4265
RPS21	0.811462	0.810461	0.804377	2.4263
RPL37A	0.789935	0.825935	0.810086	2.42596
RAC1	0.80288	0.812184	0.810843	2.42591
RPLP2	0.793019	0.817007	0.81571	2.42574
PRDX1	0.814713	0.80868	0.802216	2.42561
FBP1	0.823782	0.814802	0.786263	2.42485
LTA4H	0.786166	0.827188	0.81106	2.42441
RHOA	0.787383	0.816637	0.819499	2.42352
RPL41	0.806567	0.809869	0.806291	2.42273
AKR1B1	0.78466	0.817623	0.820443	2.42273
CYP2F1	0.638362	0.705527	1.0783	2.42219
RPS13	0.804535	0.810674	0.805992	2.4212
FAU	0.802886	0.817984	0.800226	2.4211
ANXA2	0.826129	0.795954	0.798833	2.42092
RPS17	0.784334	0.821548	0.814264	2.42015
IFI6	0.758405	0.837115	0.823199	2.41872
HSPB1	0.77814	0.813697	0.825964	2.4178
HINT1	0.785203	0.821188	0.811283	2.41767
PSMA6	0.810825	0.806931	0.799903	2.41766
YBX1	0.822197	0.803112	0.791808	2.41712
ALDOA	0.813718	0.819416	0.781388	2.41452
PSMA7	0.828289	0.796747	0.788013	2.41305
RPS20	0.788718	0.819647	0.804567	2.41293
PSAP	0.824493	0.799819	0.785832	2.41014
GPX4	0.758578	0.841525	0.809975	2.41008
RPL28	0.787381	0.821878	0.799866	2.40912
TSPO	0.841319	0.791739	0.775423	2.40848
OAZ1	0.795138	0.810745	0.80201	2.40789
CTSS	0.746739	0.853817	0.805435	2.40599
SRP14	0.807808	0.791144	0.806396	2.40535
HLA-DRB5	0.820414	0.80482	0.777561	2.40279
SFTPA2	0.797056	0.773784	0.83127	2.40211
PYCARD	0.805294	0.804727	0.790126	2.40015
VAMP8	0.791769	0.8099	0.798043	2.39971
CCT2	0.791717	0.799777	0.807872	2.39937
UQCR11	0.798765	0.806574	0.793774	2.39911
SDCBP	0.738615	0.824665	0.835588	2.39887
ENO1	0.804465	0.816309	0.777317	2.39809
PRH1	0.609992	1.01333	0.774219	2.39754
YWHAH	0.855722	0.751806	0.789841	2.39737
EEF1A1	0.789325	0.80689	0.801005	2.39722
SLC34A2	0.758886	0.819344	0.817402	2.39563
CYBA	0.824281	0.775995	0.794497	2.39477
RPS11	0.78459	0.800384	0.80963	2.3946
CHCHD2	0.767291	0.828753	0.798054	2.3941
NDUFS5	0.790356	0.80699	0.794857	2.3922
CYR61	0.797506	0.726398	0.868041	2.39194
IL1RN	0.893027	0.497761	0.998719	2.38951
UBA52	0.78342	0.801645	0.801982	2.38705
RPS16	0.76698	0.810667	0.808609	2.38626
CIB1	0.787292	0.814935	0.782953	2.38518
CSTB	0.765838	0.843396	0.774633	2.38387
CETN2	0.753253	0.832843	0.795137	2.38123
HAMP	-1.74779	0.0180965	0.613638	2.37952
HLA-DRA	0.830979	0.776971	0.770777	2.37873
CLDN5	0.633955	0.827493	0.91615	2.3776
COX7A2	0.76211	0.812049	0.803108	2.37727
LY6E	0.794874	0.77119	0.808527	2.37459
RNH1	0.771952	0.817757	0.784808	2.37452
COX6B1	0.768932	0.812436	0.79265	2.37402
CRIP1	0.882804	0.778136	0.708644	2.36958
RPSA	0.705579	0.833179	0.830506	2.36926
LYAR	0.63692	0.844619	0.88547	2.36701
TALDO1	0.789202	0.791994	0.785224	2.36642
TEKT1	0.827454	0.681966	0.854884	2.3643
HCST	0.757084	0.813432	0.793084	2.3636
MT1M	0.571789	0.816316	0.975036	2.36314
KRTAP3-1	0.858731	0.57829	0.925209	2.36223
PABPC1	0.776598	0.795887	0.789249	2.36173
FKBP1A	0.746264	0.808597	0.803669	2.35853
CALM1	0.740414	0.817523	0.800308	2.35824
ANXA5	0.772497	0.791002	0.793632	2.35713
PFDN5	0.763138	0.799608	0.792943	2.35569
SERF2	0.757719	0.80616	0.791301	2.35518
LST1	0.745893	0.802032	0.806206	2.35413
TPT1	0.744431	0.810472	0.798269	2.35317
RPL37	0.777405	0.779795	0.792786	2.34999
DNASE2	0.807523	0.750204	0.791833	2.34956
CFL1	0.771839	0.781417	0.794648	2.3479
SERPINB3	0.637378	0.732324	0.975375	2.34508
HLA-C	0.768054	0.782388	0.792126	2.34257
HLA-DQA1	0.788645	0.802053	0.746671	2.33737
PGK1	0.782455	0.775239	0.779552	2.33725
SNX3	0.754124	0.786268	0.796393	2.33679
LAMP2	0.792016	0.771904	0.77244	2.33636
HLA-DRB1	0.784589	0.794216	0.75684	2.33564
SNTN	0.596352	0.597565	1.13649	2.33041
GABARAP	0.742806	0.795849	0.788666	2.32732
GSTO1	0.764009	0.772305	0.786743	2.32306
MED24	0.683954	0.803739	0.833527	2.32122
HLA-B	0.756511	0.776218	0.781793	2.31452
GRN	0.788659	0.783496	0.741658	2.31381
CST3	0.749968	0.804158	0.757364	2.31149
HEXB	0.778847	0.751642	0.780373	2.31086
CHGA	-0.526718	1.29209	-0.489928	2.30874
AP2S1	0.752194	0.768447	0.78771	2.30835
IGSF6	0.755087	0.793346	0.759409	2.30784
PKM	0.782701	0.775176	0.749655	2.30753
BCAP31	0.68633	0.810896	0.810109	2.30733
PFN1	0.747449	0.779282	0.779983	2.30671
SARAF	0.733562	0.786465	0.786141	2.30617
MALAT1	0.798945	0.775149	0.73093	2.30502
IFI30	0.808479	0.776672	0.719212	2.30436
MYL6	0.735458	0.792622	0.77509	2.30317
ALOX5AP	0.757749	0.784081	0.758386	2.30022
FABP3	0.73463	0.836089	0.728665	2.29938
TNIP3	0.846058	0.650643	0.800909	2.29761
GLIPR2	0.731604	0.790755	0.77496	2.29732
GLRX	0.687449	0.784416	0.82506	2.29693
ORM1	0.708461	0.745779	0.8373	2.29154
RPL23	0.780987	0.787403	0.718033	2.28642
MYC	-1.60545	-0.575903	0.101544	2.2829
SRGN	0.752649	0.742602	0.785233	2.28048
BRI3	0.68154	0.805195	0.792716	2.27945
ARHGDIB	0.747642	0.76701	0.763212	2.27786
TYMP	0.742644	0.783091	0.749732	2.27547
NCOA7	0.766699	0.762842	0.745794	2.27534
CST1	0.114072	1.86238	0.295468	2.27192
ATP1B3	0.737943	0.757458	0.765194	2.2606
FTH1	0.766834	0.758598	0.733079	2.25851
MDH1	0.701897	0.79118	0.764373	2.25745
LMNA	0.647771	0.793212	0.808833	2.24982
CTGF	1.22899	0.42628	0.588015	2.24329
ATP6V0B	0.674996	0.794847	0.769908	2.23975
SFTPC	0.720707	0.736792	0.780876	2.23837
GPNMB	0.677481	0.837915	0.717244	2.23264
AIF1	0.761586	0.744413	0.726244	2.23224
CSF2	1.26215	0.558227	0.403536	2.22391
C1orf189	0.512875	0.629016	1.07652	2.21841
HLA-A	0.691823	0.758261	0.756263	2.20635
MT1X	0.695819	0.75254	0.757928	2.20629
CXCL3	0.648741	0.730063	0.825345	2.20415
RARRES1	0.600427	0.712436	0.888383	2.20125
EDN2	1.08589	0.500537	0.6124	2.19883
CAMP	0.687036	0.818048	0.682857	2.18794
ZFP36L1	0.679413	0.73508	0.773343	2.18784
IL6	0.676877	0.497386	1.00722	2.18148
TMSB4X	0.714525	0.721216	0.73709	2.17283
CPVL	0.738909	0.722295	0.701601	2.1628
TPPP3	0.591915	0.806038	0.76103	2.15898
PPT1	0.672048	0.742062	0.743151	2.15726
CTSA	0.685894	0.740037	0.730752	2.15668
MNDA	0.691502	0.723763	0.740431	2.1557
SPINK1	1.37227	0.738663	0.0446942	2.15563
BGN	0.671333	0.434324	1.04671	2.15237
MUC5B	-0.666873	0.505545	0.97629	2.14871
FTL	0.709344	0.743676	0.695076	2.1481
CFD	0.612423	0.70612	0.828991	2.14753
CCL18	0.716251	0.743901	0.67478	2.13493
BPIFB2	0.60913	0.758743	0.766959	2.13483
GPX3	0.979805	0.613925	0.538629	2.13236
AKR1C1	0.837718	0.952135	0.341894	2.13175
C11orf96	0.737939	0.643201	0.750583	2.13172
LINC00342	0.667666	0.759428	0.694534	2.12163
OGN	0.532352	0.512255	1.0707	2.11531
MS4A6A	0.784827	0.656432	0.668996	2.11026
CHST9	0.311523	0.63229	1.15907	2.10289
SOCS2	0.584653	0.770578	0.747437	2.10267
CST6	0.552543	0.599621	0.949435	2.1016
FCGR1A	0.942046	0.259365	0.899905	2.10132
B2M	0.673607	0.698239	0.709843	2.08169
LIPA	0.600915	0.714151	0.760004	2.07507
TM4SF4	0.828525	0.562418	0.677936	2.06888
GBP1	0.527928	0.733828	0.784711	2.04647
SCG2	-0.598841	-1.40259	0.0446555	2.04608
APOD	0.385922	0.8354	0.765341	1.98666
ZG16B	0.563133	0.733145	0.689246	1.98552
PI3	0.619874	0.709456	0.64403	1.97336
FCGRT	0.653524	0.66438	0.652424	1.97033
CBR3	0.551167	0.756662	0.656223	1.96405
ACTG2	0.19467	1.06265	0.703209	1.96053
PRG4	-0.0508409	1.49475	0.409234	1.95482
SPARCL1	0.57772	0.669111	0.695251	1.94208
CSF3	0.597613	0.369945	0.973297	1.94085
SCGB3A2	0.61445	0.621352	0.702792	1.93859
ID3	0.509314	0.618082	0.802504	1.9299
CCDC146	0.561725	0.592349	0.774245	1.92832
NMB	0.56908	0.67412	0.678151	1.92135
CXCL6	1.0233	-0.629258	0.260258	1.91282
LYNX1	0.228326	0.309365	1.35469	1.89238
CCL13	0.399637	-0.188221	-1.30142	1.88928
PRB1	0.697553	0.475083	0.707576	1.88021
CCL7	-0.0550087	0.677645	1.12509	1.85775
PLA2G7	0.769384	1.01903	0.0647371	1.85315
GSTA2	0.311852	0.486324	1.02697	1.82515
ANKRD36C	0.673212	0.605321	0.54308	1.82161
MYH11	0.629467	0.336834	0.84986	1.81616
GSTA1	0.260059	0.673323	0.878195	1.81158
C12orf75	0.612226	0.27507	0.919881	1.80718
CD44	0.130589	0.891538	0.775399	1.79753
JCHAIN	0.442631	0.657998	0.692527	1.79316
SCGB3A1	0.623399	0.556082	0.611046	1.79053
CXCL1	0.454523	0.750177	0.585507	1.79021
FGG	0.08971	0.542887	1.1535	1.7861
SPRR3	0.358024	0.552115	0.847386	1.75752
LRRIQ1	0.409862	0.609032	0.734689	1.75358
EGR1	-0.134883	0.623897	0.991149	1.74993
MT1F	0.344708	0.757622	0.642834	1.74516
SCGB1A1	0.572845	0.566363	0.568984	1.70819
SCGB2A1	0.406454	0.379084	0.921663	1.7072
EMCN	0.774599	0.304981	0.622105	1.70169
AARD	0.522545	0.42292	0.736179	1.68164
MUCL1	0.361226	0.554188	0.724455	1.63987
CTSK	-0.0740627	-0.572008	0.958517	1.60459
THBS1	0.110547	0.545874	0.937443	1.59386
SYT8	0.323306	0.685517	0.570204	1.57903
HTRA3	-0.11648	0.832361	0.622338	1.57118
GRP	1.12728	-0.369525	-0.00299986	1.4998
WISP2	0.212233	-0.277598	1.007	1.49683
STC1	0.556208	0.508003	0.425908	1.49012
IER3	0.144108	0.589738	0.744659	1.4785
SCG5	0.766614	-0.590069	0.116101	1.47278
MT1A	-0.135937	0.425298	0.892574	1.45381
CRISP3	0.257112	0.479543	0.697455	1.43411
ALB	-0.974563	0.238783	0.20609	1.41944
AZGP1	-0.352501	0.225589	0.84007	1.41816
SELE	0.228715	-0.0503226	1.10777	1.38681
AQP1	0.511753	0.270725	0.591919	1.3744
KRT6A	0.187553	0.371372	0.799092	1.35802
JUNB	0.238481	0.604049	0.483063	1.32559
PLA2G2D	-0.0575419	0.969771	0.265052	1.29236
VCAM1	0.195826	0.677964	0.412111	1.2859
LIF	0.394823	0.507265	0.350095	1.25218
ISG15	0.26332	0.223777	0.764374	1.25147
FOSB	-0.0715258	0.480012	0.676114	1.22765
CCL8	0.146439	0.538343	0.49171	1.17649
CD69	-0.483911	-0.410833	-0.265947	1.16069
SMR3A	0.2349	0.23734	0.68279	1.15503
GAS1	0.50069	-0.110149	0.503819	1.11466
PLAT	0.17954	0.434584	0.482783	1.09691
PCP4	-0.112118	-0.569088	-0.380219	1.06142
SERPINB4	0.408497	-0.0160377	0.619656	1.04419
CALCA	-0.348044	-0.444883	0.22313	1.01606
HBA1	0.0312014	0.514926	0.427837	0.973964
SERPINE1	-0.37302	-0.386749	0.198308	0.958077
PRH2	0.00114492	0.230768	0.702776	0.934689
PAPPA	-0.28715	-0.423053	-0.193756	0.90396
TAC1	0.227064	0.263203	0.371003	0.86127
CHGB	0.00650133	-0.669318	0.154446	0.830265
CD1B	-0.491031	-0.282576	0.0364352	0.810042
MEG3	0.167093	0.290552	0.351285	0.80893
DDC	0.142446	-0.424914	0.22827	0.79563
GFRA3	-0.0878418	-0.296259	0.399314	0.783415
TUBB1	0.0016688	0.360744	0.412469	0.774882
CPLX2	0.455818	0.158911	0.15919	0.773918
SLN	-0.281931	0.43768	0.0497387	0.76935
HBA2	0.174113	0.393334	-0.164004	0.73145
HSPA1A	0.0768143	0.462462	-0.186047	0.725323
SCGN	0.0997175	-0.34957	0.214638	0.663925
PAEP	0.0666526	0.186227	0.404692	0.657572
GHRL	-0.0245706	-0.368458	-0.202377	0.595406
LTB	0.398507	-0.14565	0.0343821	0.57854
NTS	0.127499	-0.365099	0.0723979	0.564997
CEL	-0.191054	-0.305843	-0.0550915	0.551988
GP2	0.0733875	0.214059	0.25373	0.541177
RDH12	0.0116234	0.321105	0.186521	0.519249
CXCR4	-0.464358	-0.0038954	0.0368507	0.505104
MMP11	-0.065289	-0.229692	-0.206462	0.501444
SLC26A4	-0.0446492	0.266335	0.107565	0.41855
MMP10	0.199634	-0.183903	0.031717	0.415254
CYP2A6	-0.0623913	-0.0478462	0.293177	0.403414
COL22A1	0.00842178	0.235824	0.129462	0.373708
KRT14	0.0213288	0.014793	0.317761	0.353882
ASCL1	0.0758434	0.0819406	0.194142	0.351926
PRSS2	-0.0240675	-0.191742	-0.0983548	0.314164
RPRM	0.0162226	-0.178461	0.0957496	0.290433
ANKRD1	0.0467906	0.206965	0.0337547	0.287511
RGS4	-0.0622782	0.0908179	-0.0749851	0.228081
COMP	0.0095632	0.126096	-0.0336791	0.169338
NEFM	0.0469624	0.0705646	-0.0446085	0.162135
HIST1H1A	0.0224901	0.117357	-0.0210356	0.160883
PRAP1	-0.0239244	-0.0887916	-0.0448513	0.157567
DIO2	0.072663	0.0491128	0.0297189	0.151495
CPB1	0.0180329	-0.0981236	-0.015814	0.131971
ACTC1	0.0183701	-0.0190797	0.0889842	0.126434
CXCL13	0.0419864	0.0274077	0.0337214	0.103116
PLP1	-0.00887383	0.0360789	0.0133882	0.0583409
MMP12	0.0135288	0.030658	-0.0120841	0.056271
MIR7-3HG	0.00430452	0.00435135	0.0386345	0.0472903
IGFL1	0.00644108	0.0240515	0.00836722	0.0388598
PI15	0.00855672	0.0158601	-0.0100415	0.0344583
IGLL1	0.000276408	-0.00296281	-0.00655029	0.00978951
S100A7	-1.4937e-05	-0.000869246	-0.000779829	0.00166401
DEFA4	3.44413e-05	-1.92552e-05	-7.65948e-05	0.000130291
FABP7	-1.16706e-29	2.73977e-12	1.22322e-09	1.22596e-09
MUC7	-1.16706e-29	2.73977e-12	1.22322e-09	1.22596e-09
OTP	-1.16706e-29	2.73977e-12	1.22322e-09	1.22596e-09
PRB4	-1.16706e-29	2.73977e-12	1.22322e-09	1.22596e-09
PTPRN	-1.16706e-29	2.73977e-12	1.22322e-09	1.22596e-09

## Sheet: Supplemental_Table_S8
Supplemental_Table_S8. The P-values of GO terms enriched from COVID-19 Mild and Severe
COVID-19 patients	GO term	P-value
Mild	Immune response	0.0356902
	Antimicrobial humoral immune response mediated by antimicrobial peptide	0.0311867
	Cellular response to interleukin-1	0.0218735
	Inflammatory response	0.0204235
	Cell division	0.0159403
	Killing of cells of other organism	0.0139911
	Exogenous lipid antigen binding	0.0126301
	Antigen processing and presentation, endogenous lipid antigen via MHC class Ib	0.0126099
	Positive regulation of apoptotic process	0.00985971
	Chemokine activity	0.00715315
Severe	Immune response	0.033425
	Cellular response to interferon-gamma	0.0251325
	Weibel-Palade body	0.0139145
	Cytokine activity	0.0127533
	CXCR3 chemokine receptor binding	0.0126301
	Positive regulation of apoptotic process	0.00917629
	Positive regulation of release of sequestered calcium ion into cytosol	0.0026808
	Neutrophil chemotaxis	0.00110848
	Antimicrobial humoral immune response mediated by antimicrobial peptide	0.000153676
	Killing of cells of other organism	2.87589e-05

## Sheet: Supplemental_Table_S9
Supplemental_Table_S9. Accuracy comparison of benchmark methods on various datasets
Method	PBMC-FACS	AMB	PBMC	Human	Mouse
SCENIC	0.3324	0.3841	0.3402	0.4742	0.4518
CellAssign	0.1411	0.0969	0.1847	0.0981	0.0761
Garnett	-	-	0.0691	0.5999	0.2477
ACTINN	0.8419	0.9868	0.3402	0.6103	0.7568
scHGR	0.8983	0.989	0.8007	0.8068	0.8586
