# Supplementary figures and images for: A gene regulatory network–aware graph learning method for cell identity annotation in single-cell RNA-seq data
Source: HighWire-hosted journal article supplement (doi:10.1101/gr.278439.123), 2024-07-01

model loss

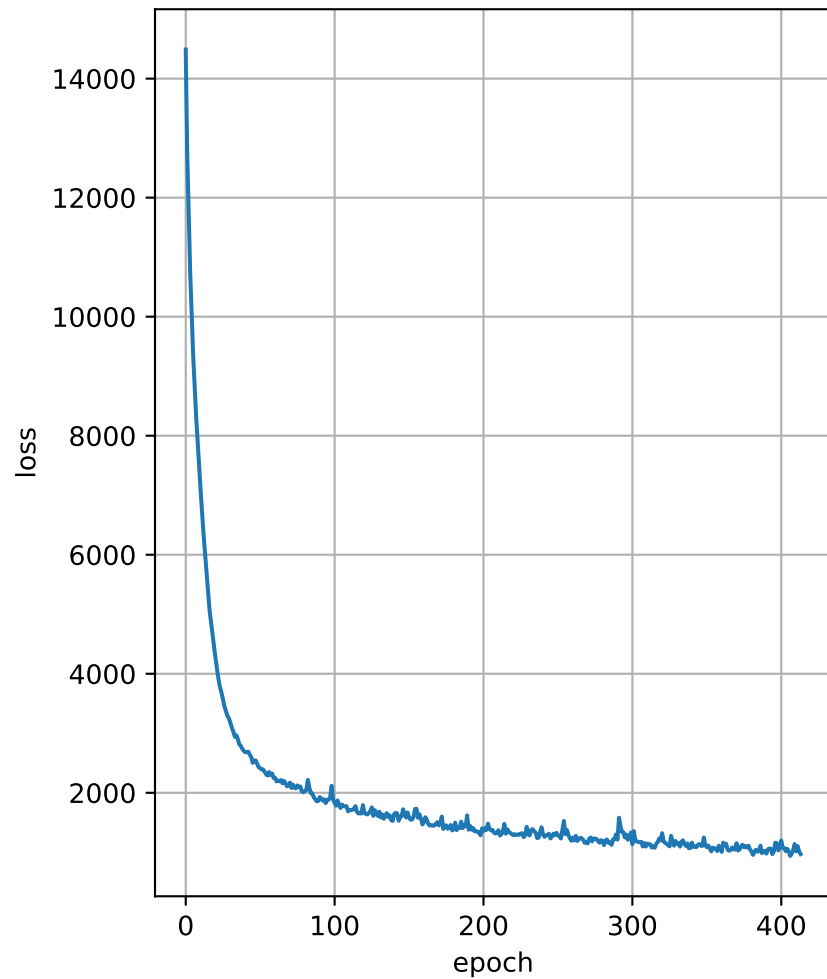

model accuracy

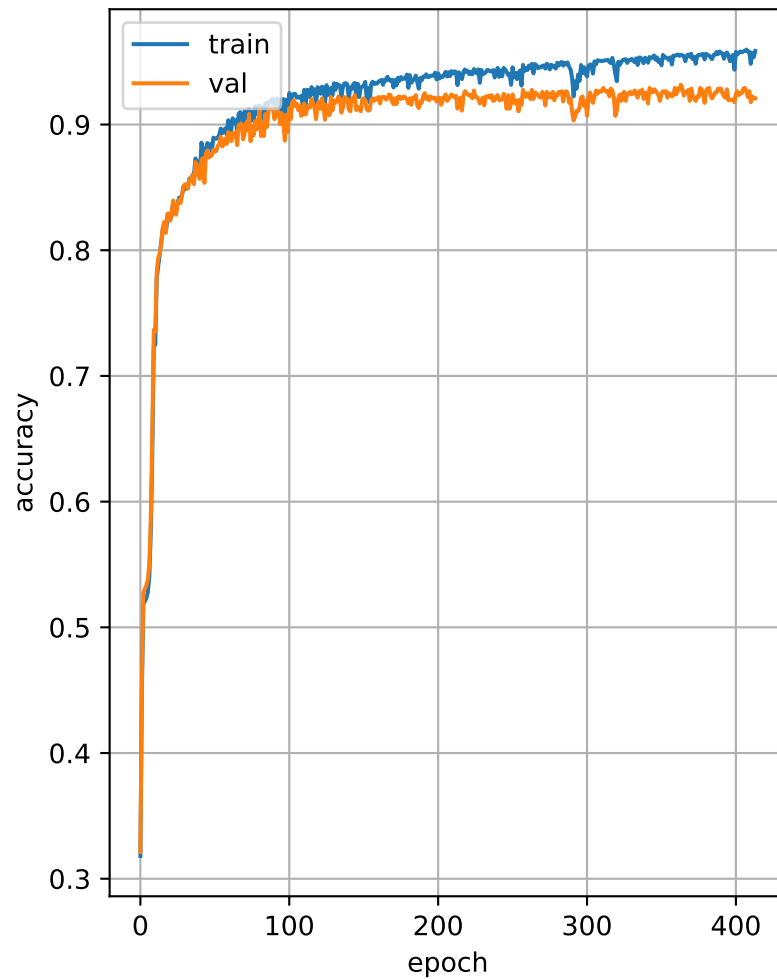

Supplement: Supplemental_Code.zip [file train_record.pdf › scHGR-main/output/model/train_record.pdf]
